# Supplementary material for: Uncovering the secrets of agarwood aroma according to regions and grades using a comprehensive analytical strategy
Source: Royal Society of Chemistry journal article supplement (doi:10.1039/d3cc06164g), 2024-01-01
Supplement: d3cc06164g1.pdf [file d3cc06164g1.pdf]

# Supplementary material

## Uncovering the Secrets of Agarwood Aroma with Regions and Grades using A Comprehensive Analytical Strategy

Yanqiao Xie <sup>a</sup>, Chen Shen <sup>b</sup>, Ge Yin <sup>b</sup>, Siyu Zhang <sup>a</sup>, Yilin Chen <sup>a</sup>, Wenxiang Fan <sup>a</sup>,  
Kaixian Chen <sup>a</sup>, Zhengtao Wang <sup>a</sup>, Linnan Li <sup>a,\*</sup>, Li Yang <sup>a,\*</sup>

<sup>a</sup> The MOE Key Laboratory of Standardization of Chinese Medicines, The SATCM  
Key Laboratory of New Resources and Quality Evaluation of Chinese Medicines, The  
Shanghai Key Laboratory for Compound Chinese Medicines, Institute of Chinese  
Materia Medica, Shanghai University of Traditional Chinese Medicine, Shanghai  
201203, China

<sup>b</sup> Shimadzu (China) Co., LTD, Shanghai, 200233, China

\*Corresponding author:

E-mail: linnanli@shutcm.edu.cn (Prof. Linnan Li); yl7@shutcm.edu.cn (Prof. Li Yang)

## **Materials and methods**

### **1.1 Materials**

A total of 55 batches agarwood samples used in this study were obtained from different sources, including China, Vietnam, Cambodia, Myanmar, Brunei, and Indonesia. 15 batches of agarwood (Samples 1-15) were collected from China, 22 batches of agarwood (Samples 16-31, Samples 49-55) were collected from Vietnam, of which samples 49-55 were Kynam, 2 batches of agarwood (Samples 32-33) were obtained from Myanmar, 3 batches of agarwood (Samples 34-36) were obtained from Cambodia. Moreover, agarwood from the Sin-chew zone were also collected, 10 batches agarwood (Samples 37-46) were collected from Indonesia, the rest of 2 batches agarwood were obtained from Brunei. The above agarwood samples include artificial perforated and chemically induced agarwood as well as various types of wild agarwood. Agarwood samples used in this experiment were provided and authenticated by Agarwood Professional Committee of Shanghai Commercial Federation (Shanghai, China). Voucher specimens were deposited in the herbarium of the Institute of Chinese Materia Medica, Shanghai University of Traditional Chinese Medicine (Shanghai, China). All the samples are crushed into powder before use.

The SPME fiber used in this experiment was divinyl benzene/carboxen/polydimethylsiloxane (DVB/CAR/PDMS) (50/30  $\mu\text{m}$ , 10 mm) fiber and the SPME arrow was divinyl benzene/carbon-WR/poly-dimethylsiloxane ((DVB/C-WR/PDMS) (120  $\mu\text{m}$ , 20 mm) that produced from Supelco Inc. (Bellefonte, PA, USA).

### **1.2 Morphological identification**

The morphological identification of the agarwood samples was evaluated based on the description in the Chinese Pharmacopoeia (2020 version). The quality of the samples was evaluated by observing the appearance, color, odor, texture, and the extent of the distribution of dark brown or tan resin on the wood surface. The samples were preliminarily divided into high quality and ordinary agarwood.

### **1.3 Establishment of MRM and SIM method**

The creation of the MRM method consisted of determining the precursor ions, setting the product ions, and optimizing the collision energy steps. The Q3 Scan data file based

on the mixed solution of the standard was used to determine the precursor ions, then the product ion determination method was created. Moreover, the collision voltage range and voltage interval were entered to create the scanning method with different CE voltages. Finally, optimized ion pairs and CE voltages using standards can be used to obtain higher sensitivity data, and the detailed information of the database is listed in Table S1.

In addition, SIM method was automatically created based on the smart aroma database. First of all, there is a built-in standard curve in the database, and a calibrated standard curve is obtained based on the internal standard solution (p-Bromofluorobenzene, 1,2-Dichlorobenzene-d4, and Acenaphthene-d10). For sample determination, the concentration of the target compound can be obtained based on the peak area, and the concentration (pg/mg) in the sample is automatically calculated by inserting the weight of the sample into the software.

#### **1.4 HS-SPME-GC-MS analysis**

The agarwood samples were analyzed using a headspace preheated system (AOC-6000). 100 mg of agarwood powder was weighted and placed in a 20 mL glass vial. The vials were sealed using Teflon and placed into a headspace autosampler oven. The pretreat temperature was set to 90°C for 30 min, the aroma compounds were enriched by SPME arrow and subsequently desorbed and transported by carrier gas to GC-MS for analysis. A sample vial without agarwood powder was also tested by the same conditions and used as a control. Correction of retention time is performed by using normal alkanes to ensure high reliability of compound identification.

The chemical constituents of odor from agarwood were identified by using TQ8050 NX Triple Quadrupole GC-MS (Shimadzu Corporation, Kyoto, Japan) operated in Full scan and multiple reaction monitoring (MRM) mode simultaneously. The GC separation was performed by using a Inertcap pure-wax column (30 m × 0.25 mm, 0.25 μm, GL Sciences). The temperature of transfer and sample lines was kept at 150°C. Ultra-high purity helium (99.99%) was used as carrier gas with a flow rate of 4 mL/min. The analytic conditions were as follows: injection port temperature of 250 °C; split ratio of 5:1. The chromatographic conditions for GC are specified as follows: the initial

temperature was at 50 °C and held for 5.0 min, then increased to 250 °C at 10 °C/min and held for 10.0 min. Electron ionization (EI) was used as the ionization method, and the ion source temperature was set at 200°C.

### **1.5 GC-MS Data processing**

The acquired data were identified based on two databases. Firstly, the peaks obtained in SCAN mode were identified qualitatively based on the National Institute of Standards and Technology (NIST) MS Library, NIST 17. The collected mass spectral data were compared with the standards from database, in which the similarity greater than 85% could be considered as the same compound. Besides, the data obtained in MRM mode were compared with the retention time and characteristic ion pairs from the smart aroma database, enabling rapid screening of trace aroma compositions in samples.

### **1.6 Chemometrics analysis**

Before performing the chemometric analysis, raw GC-MS data (.qgd file) were formatted into a NetCDF file by LabSolutions software (version 4.5, Shimadzu Corp., Kyoto, Japan). The NetCDF file was then loaded into MSDIAL online platform (<http://prime.psc.riken.jp/compms/msdial/main.html>) to perform deconvolution and alignment and generate a normalized dataset. After that, the normalized dataset was further subjected to principal component analysis (PCA), partial least squares discriminant analysis (PLS-DA), orthogonal projection to latent structures discriminant analysis (OPLS-DA) and hierarchical cluster analysis (HCA) by SIMCA 14.0 software (Umetrics, Umeå, Sweden), which aimed to identify differences between various origin and different quality agarwood and highlight components that make prominent contribution to the grouping (VIP > 1). Heat map analysis was conducted by using Origin software (Northampton, Massachusetts, USA). One-way ANOVA was performed using Statistical Product and Service Solutions (SPSS) software (Armonk, New York, USA).

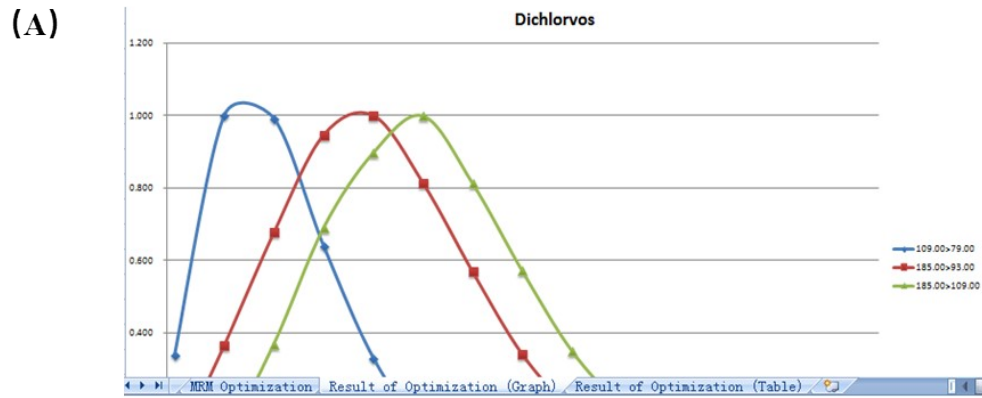

(B)

Divide Method into 1

Import

MRM Transition

| Serial# | Type   | Acq. Mode | Method No. | Compound Name (E) | Ion1 |               |    |        | Ion2  |               |    |       |       |     |
|---------|--------|-----------|------------|-------------------|------|---------------|----|--------|-------|---------------|----|-------|-------|-----|
|         |        |           |            |                   | Type | m/z           | CE | Ratio  | Type  | m/z           | CE | Ratio |       |     |
| 1       | Target | MRM       | 1          | Dichlorvos        | T    | 109.00>79.00  | 6  | 100.00 | Ref.1 | 185.00>93.00  | 15 | 53.77 | Ref.2 | 185 |
| 2       | Target | MRM       | 1          | Fenobucarb        | T    | 121.00>77.10  | 21 | 100.00 | Ref.1 | 150.00>121.10 | 12 | 66.40 | Ref.2 | 121 |
| 3       | Target | MRM       | 1          | Simazine          | T    | 201.00>173.10 | 6  | 100.00 | Ref.1 | 201.00>186.10 | 6  | 34.31 | Ref.2 | 201 |
| 4       | Target | MRM       | 1          | Propyzamide       | T    | 173.00>145.00 | 15 | 100.00 | Ref.1 | 175.00>147.00 | 15 | 60.66 | Ref.2 | 173 |
| 5       | Target | MRM       | 1          | Diazinon          | T    | 201.00>179.10 | 15 | 100.00 | Ref.1 | 179.00>157.20 | 18 | 84.83 | Ref.2 | 179 |

Database / msknameIndexTable / MTableView

**Fig. S1** Establishment of MRM method. (A) Optimization of collision voltage; (B) Diagram of Smart Database.

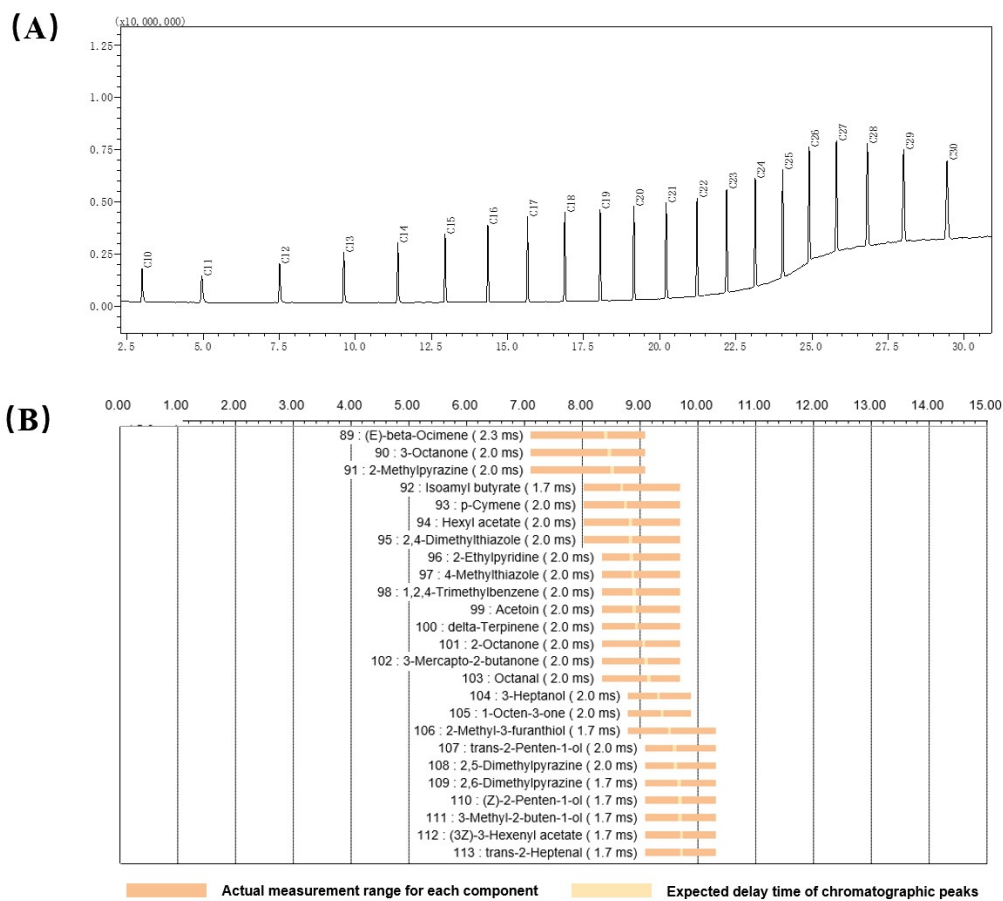

**Fig. S2** (A) Mass spectra of n-alkanes (C9-C30); (B) Schematic diagram of the AART function.

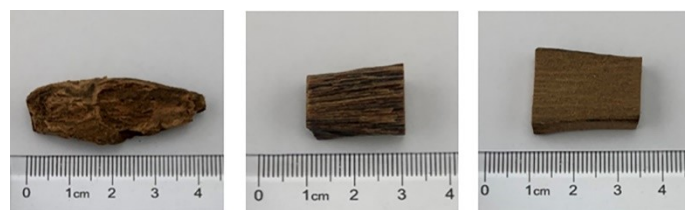

**Kynam agarwood**

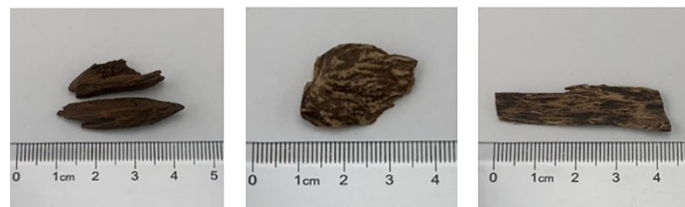

**High quality agarwood**

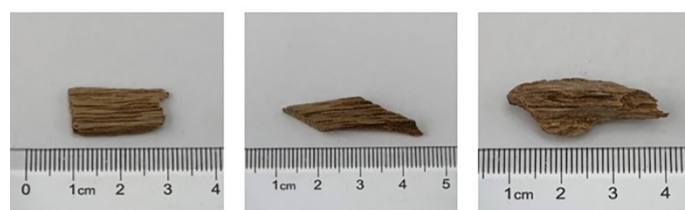

**Ordinary agarwood**

**Fig. S3** Representative photograph of different agarwood samples in this study.

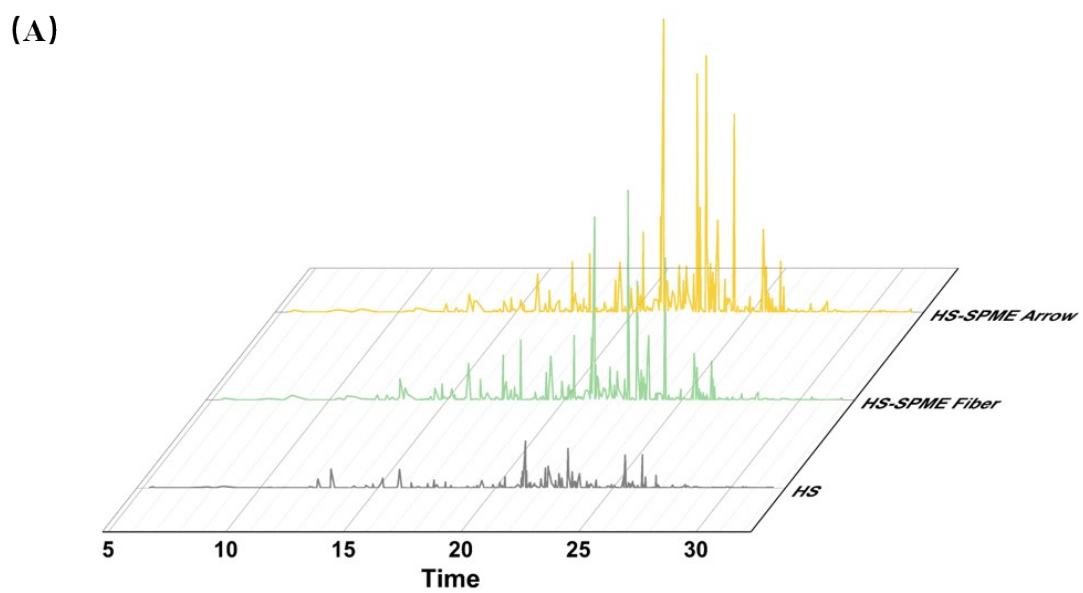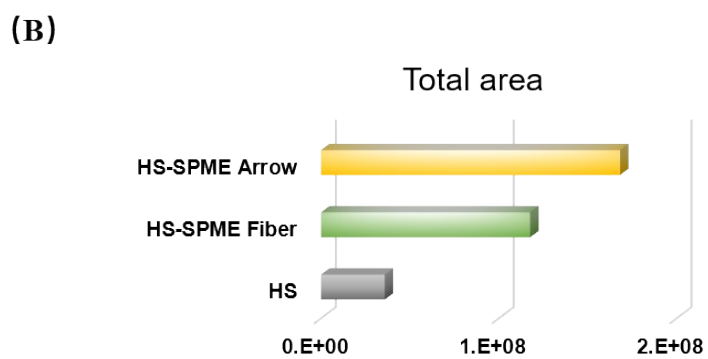

**Fig. S4** Total GC–MS ion chromatograms (A) and Histogram of the sum of peak areas (B) detected by HS, HS-SPME Fiber and HS-SPME arrow methods.



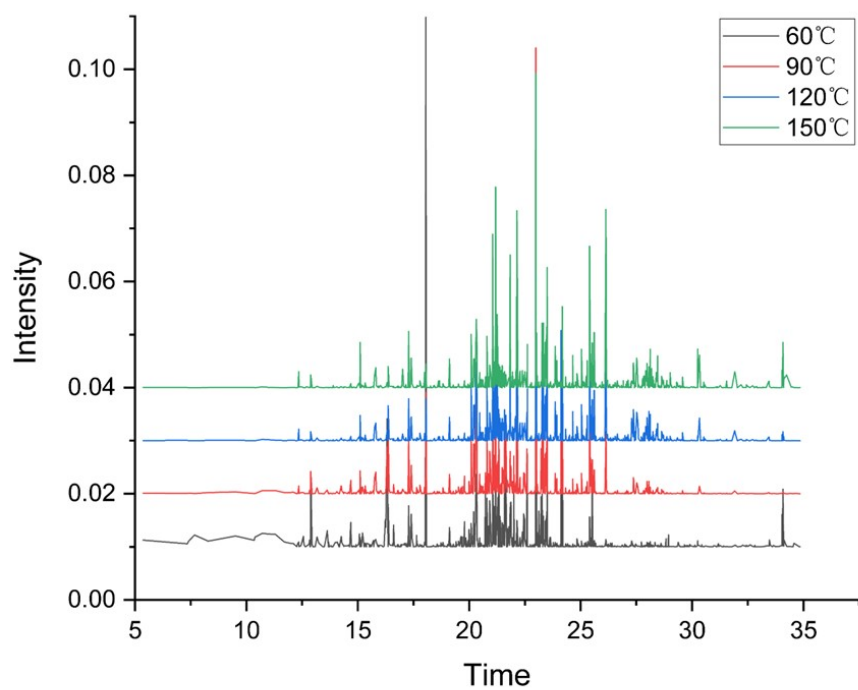

**Fig. S5** Total GC–MS ion chromatograms of different extraction temperatures.

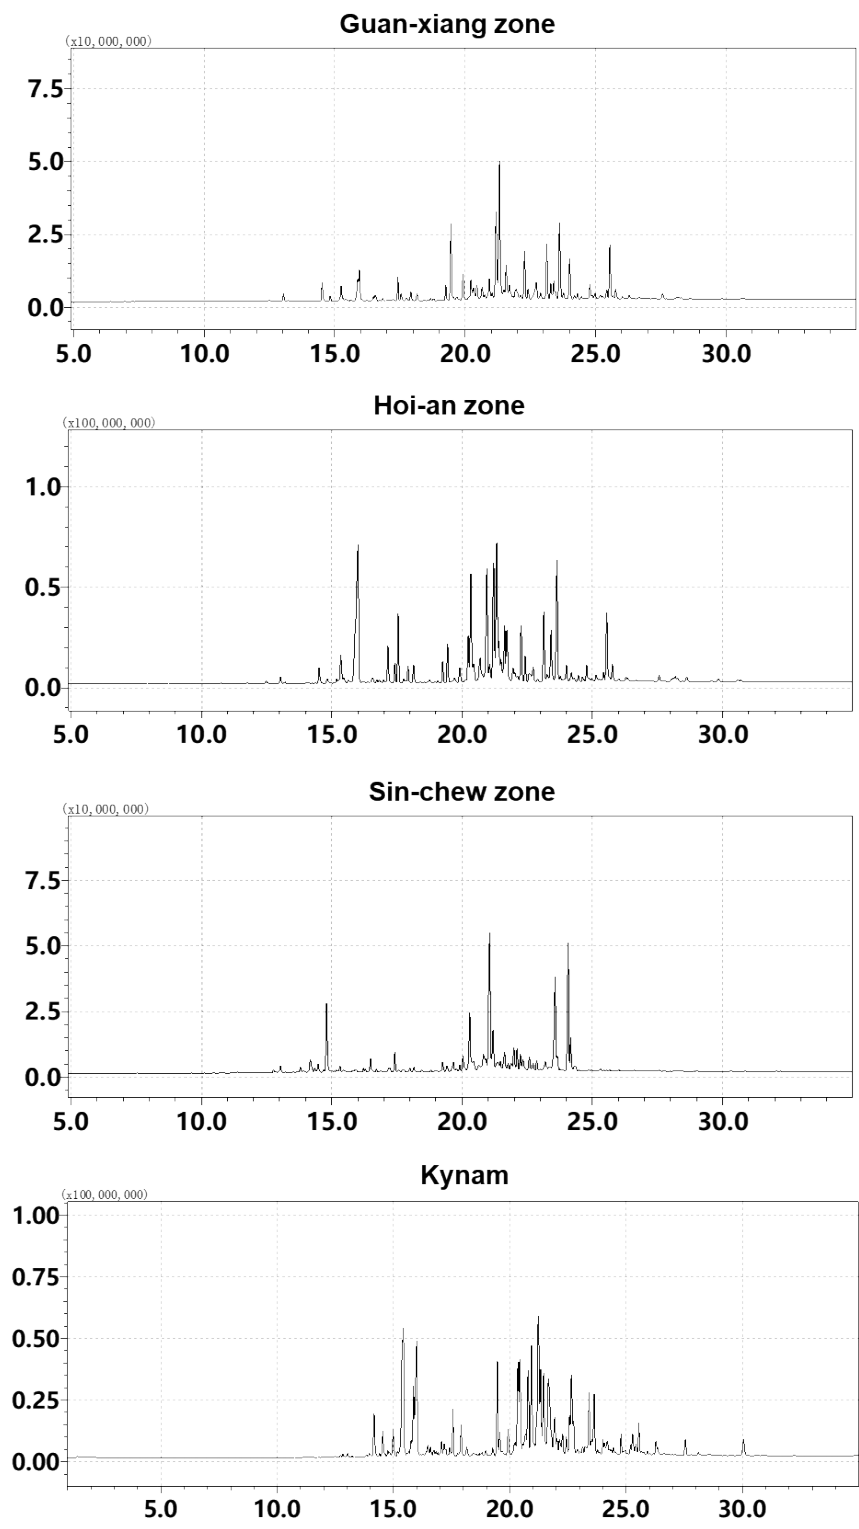

**Fig. S6** Representative gas-chromatogram of agarwood from different zones and different species.

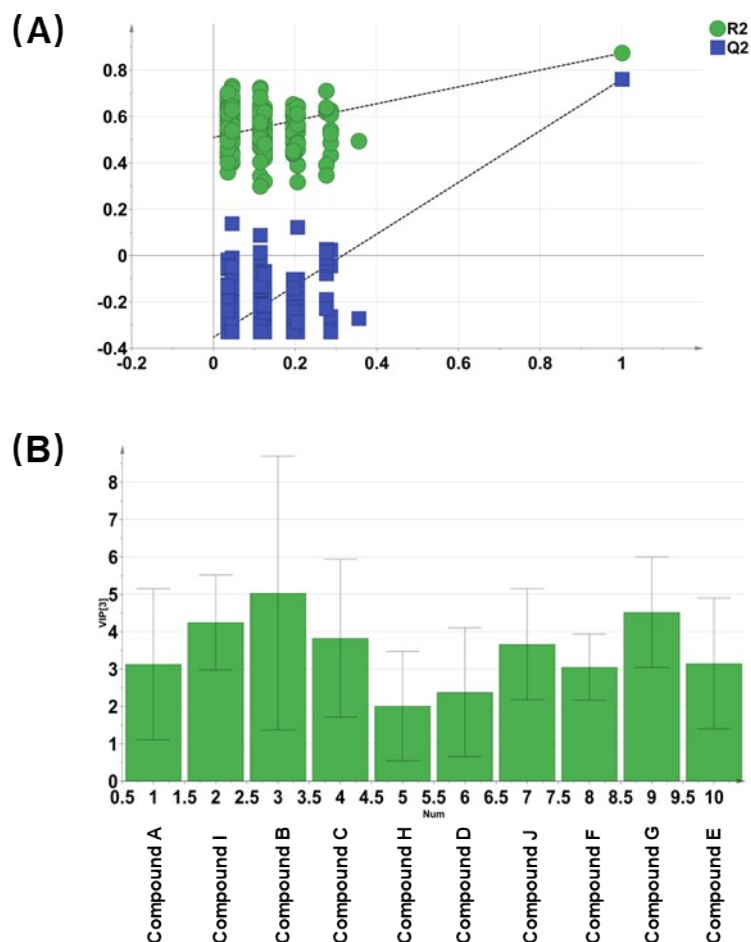

**Fig. S7** (A) Replacement verification results of agarwood Samples (200 times of cross verification) for the PLS-DA model, (B) VIP value plot of PLS-DA model based on SCAN mode (Compound A:  $\alpha$ -Guaiene, Compound B: (4S,4aR,6R)-4,4a-Dimethyl-6-(prop-1-en-2-yl)-1,2,3,4,4a,5,6,7-octahydronaphthalene, Compound C:  $\alpha$ -Bulnesene, Compound D: (-)-Nootkatene, Compound E: Eremophila-1(10),11-dien-9-one, Compound F: 1,1,4,7-Tetramethyldecahydro-1H-cyclopropa[e]azulene-4,7-diol, Compound G: (-)-Aristolene, Compound H: Guaiol, Compound I: (3S,3aS,6R,8aS)-3,8,8-Trimethyl-7-methyleneoctahydro-1H-3a,6-methanoazulene, Compound J: (3S,3aS,6R,7S,8aS)-3,7,8,8-Tetramethyloctahydro-1H-3a,6-methanoazulen-7-ol)).

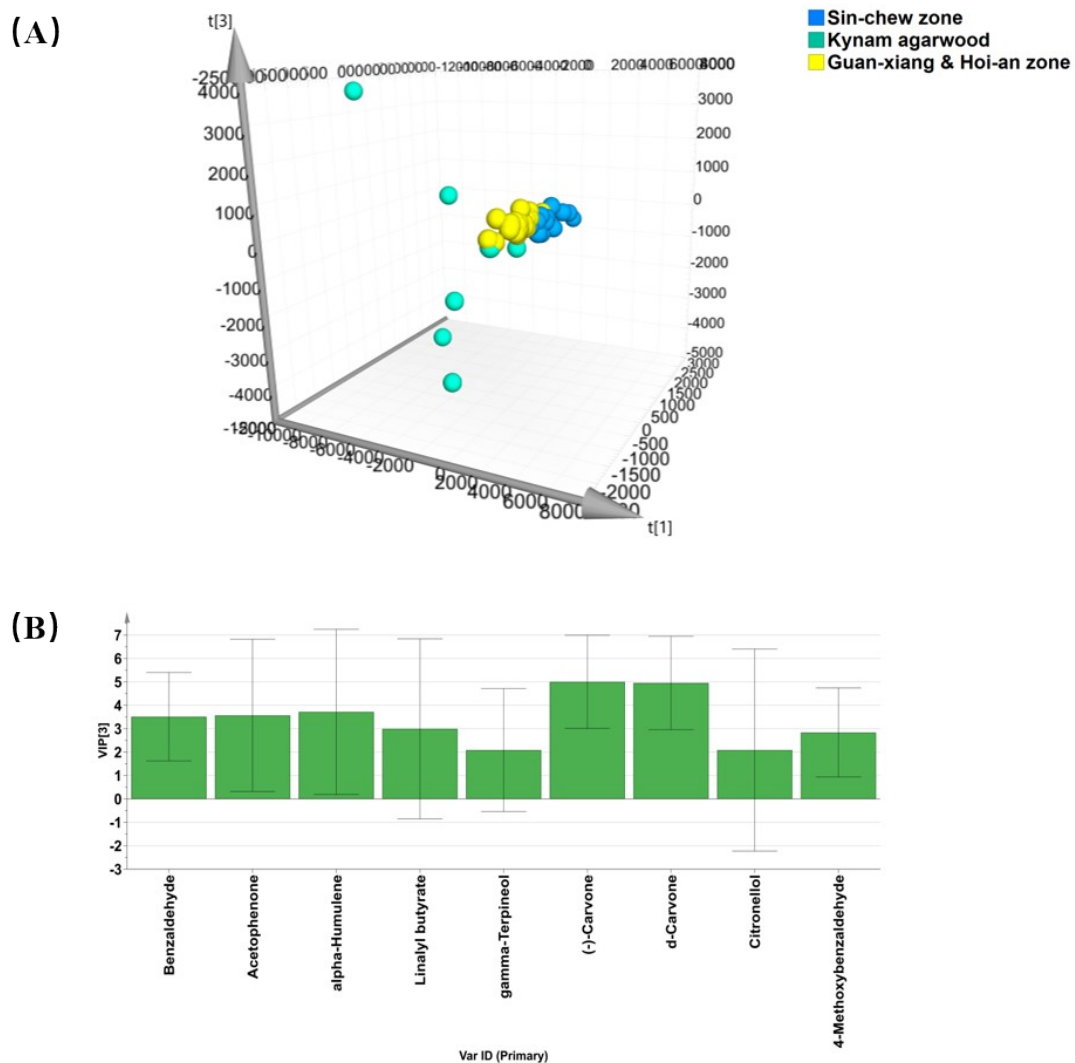

**Fig. S8** Multivariate statistical analysis of different zones of agarwood based on MRM mode ((A) PLS-DA score plot; (B) VIP value (>1)).

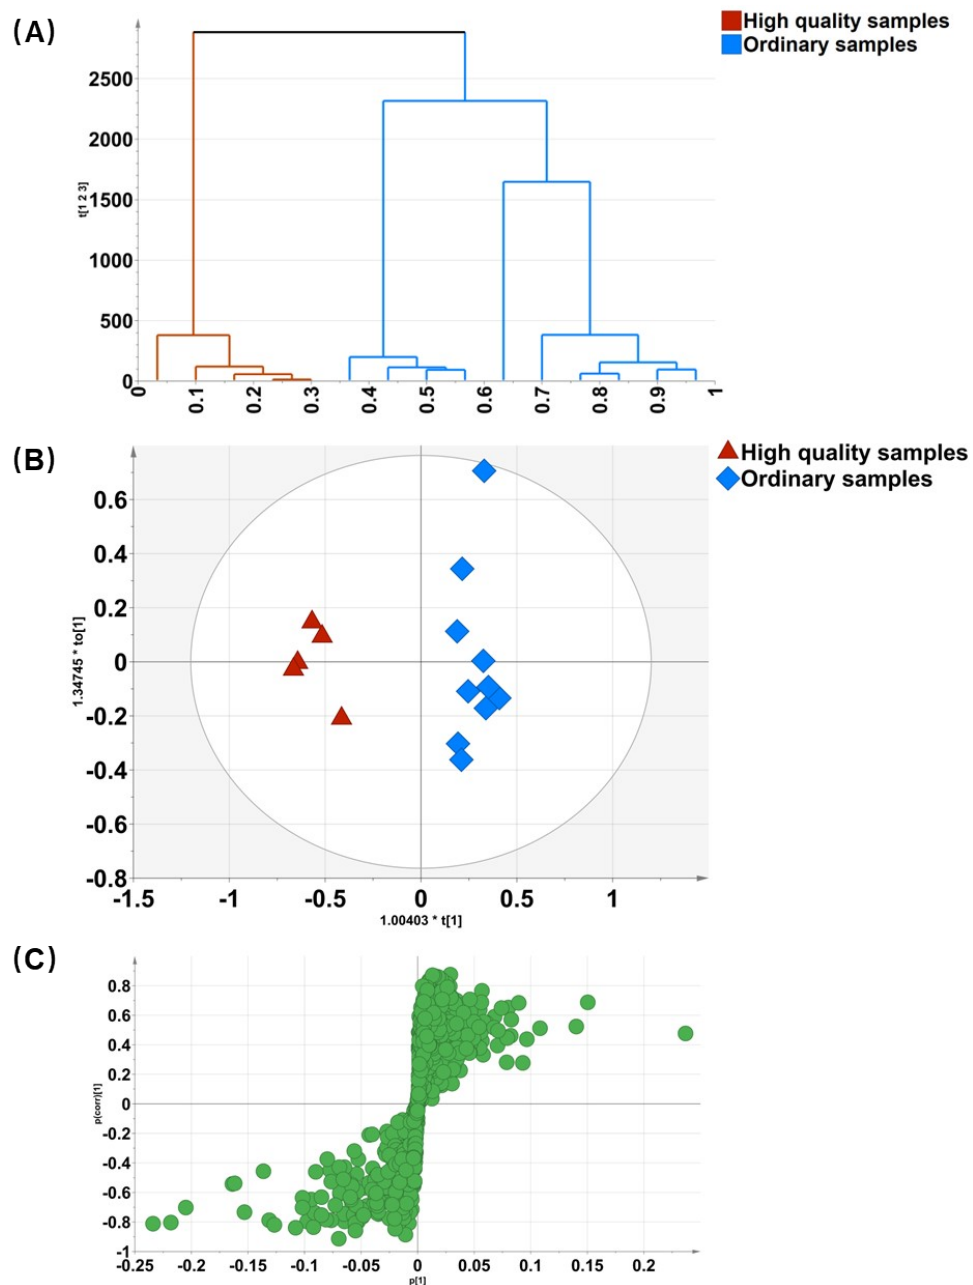

**Fig. S9** Multivariate statistical analysis of different quality agarwood from Guan-xiang zone based on SCAN mode ((A) HCA analysis diagram; (B) OPLS-DA score plot; (C) S-plot).

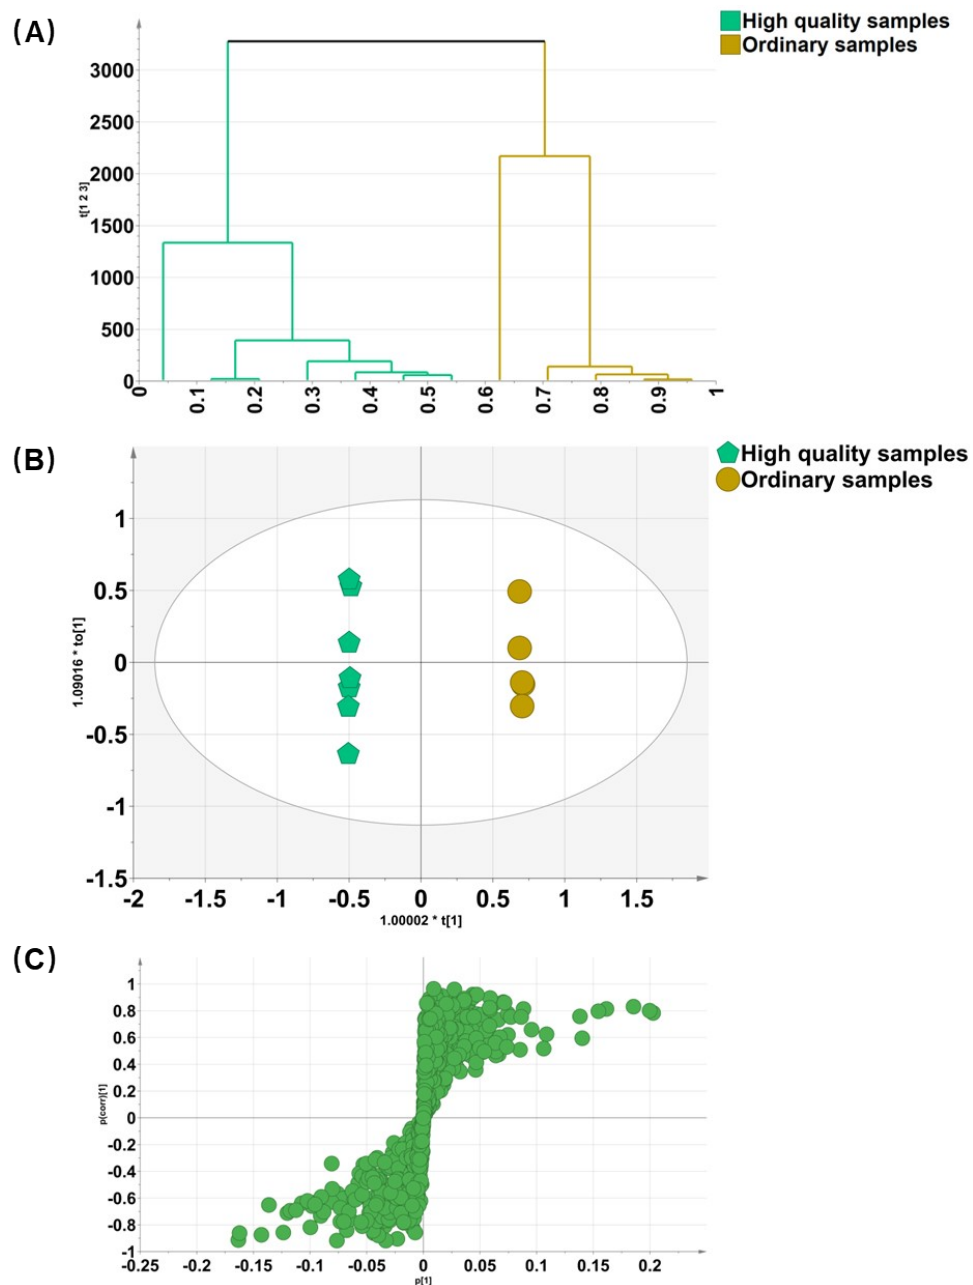

**Fig. S10** Multivariate statistical analysis of different quality agarwood from Sin-chew zone based on SCAN mode ((A) HCA analysis diagram; (B) OPLS-DA score plot; (C) S-plot).









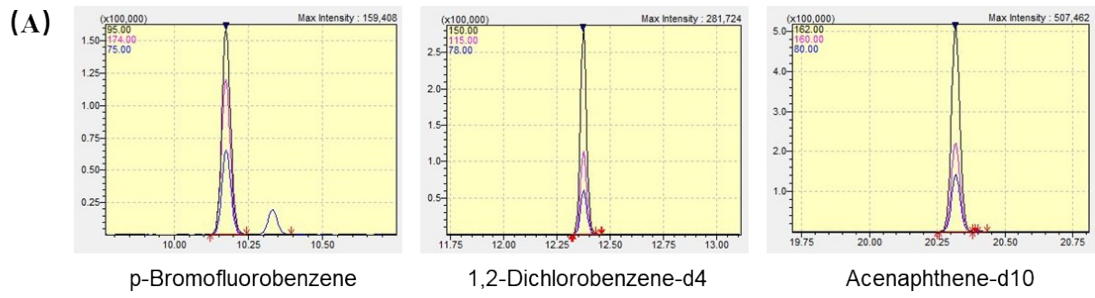

(B)

Quantitative Parameters

Peak Integration   Identification   Quantitative   Compound Table   Compound Table Search

| ID# | Name                | Ret. Time | Ret. Index | m/z    | Ref. Ions   | Unit  |
|-----|---------------------|-----------|------------|--------|-------------|-------|
| 1   | 2-Methylfuran       | 1.731     | 850        | 82.10  | 53.10-81.10 | pg/mg |
| 2   | Ethyl formate       | 1.797     | 857        | 74.10  | 56.10-73.10 | pg/mg |
| 3   | Butanal             | 2.012     | 880        | 72.10  | 44.10-57.10 | pg/mg |
| 4   | Ethyl acetate       | 2.068     | 886        | 43.00  | 45.00-70.00 | pg/mg |
| 5   | Acetal              | 2.133     | 893        | 103.10 | 45.10-73.10 | pg/mg |
| 6   | 2-Butanone          | 2.133     | 893        | 72.10  | 43.10-57.10 | pg/mg |
| 7   | Diethyl sulfide     | 2.152     | 895        | 90.10  | 75.00-62.00 | pg/mg |
| 8   | 2-Methylbutanal     | 2.227     | 903        | 86.10  | 57.10-58.10 | pg/mg |
| 9   | 3-Methylbutanal     | 2.274     | 908        | 71.00  | 58.00-86.00 | pg/mg |
| 10  | Methyl isobutyrate  | 2.330     | 914        | 102.10 | 71.10-87.10 | pg/mg |
| 11  | 3-Methyl-2-butanone | 2.348     | 916        | 86.10  | 43.10-41.10 | pg/mg |
| 12  | 2-Ethylfuran        | 2.526     | 935        | 96.10  | 81.10-53.10 | pg/mg |
| 13  | Ethyl propanoate    | 2.629     | 946        | 102.10 | 74.10-75.10 | pg/mg |
| 14  | Ethyl isobutyrate   | 2.704     | 954        | 116.10 | 71.10-88.10 | pg/mg |
| 15  | Diethyl             | 2.760     | 960        | 86.00  | 43.00-42.00 | pg/mg |

Param's \ GroupParam's /

OK   Cancel   Help

**Fig. S14** (A) Mass spectra of internal standard compounds (B) Diagram of the results of semi-quantitative calculations.

**Table S1** Specific information for odor components in smart aroma database.

| Compound                | Retention time | Retention index | Ion pair     |
|-------------------------|----------------|-----------------|--------------|
| 2-Methylfuran           | 1.62           | 850             | 82.10>54.00  |
| Butanal                 | 1.893          | 880             | 72.10>57.00  |
| Ethyl acetate           | 1.948          | 886             | 70.00>55.00  |
| Acetal                  | 2.011          | 893             | 73.10>45.10  |
| 2-Butanone              | 2.011          | 893             | 72.10>43.10  |
| Diethyl sulfide         | 2.03           | 895             | 90.10>75.10  |
| Methyl isobutyrate      | 2.203          | 914             | 71.10>43.10  |
| 3-Methyl-2-butanone     | 2.221          | 916             | 86.10>43.10  |
| 2-Ethylfuran            | 2.394          | 935             | 96.10>81.00  |
| Ethyl propanoate        | 2.494          | 946             | 102.10>74.10 |
| Ethyl isobutyrate       | 2.567          | 954             | 116.10>88.10 |
| Diacetyl                | 2.621          | 960             | 86.00>43.00  |
| 2-Pentanone             | 2.631          | 961             | 86.10>71.10  |
| 3-Pentanone             | 2.64           | 962             | 86.10>57.10  |
| Propyl acetate          | 2.658          | 964             | 61.00>43.10  |
| Methyl Butanoate        | 2.749          | 974             | 71.10>43.10  |
| 2-Methyl-3-pentanone    | 2.84           | 984             | 71.10>43.10  |
| Methyl isobutyl ketone  | 2.949          | 996             | 100.10>85.10 |
| Methyl 2-methylbutyrate | 3.045          | 1003            | 88.10>57.10  |
| Ethyl vinyl ketone      | 3.103          | 1006            | 84.10>55.10  |
| Methyl isovalerate      | 3.143          | 1008            | 74.10>43.00  |
| Thiophene               | 3.162          | 1009            | 84.00>58.00  |
| 2-Butanol               | 3.182          | 1010            | 59.10>31.10  |
| alpha-Pinene            | 3.221          | 1012            | 93.00>77.00  |
| Propanol                | 3.378          | 1020            | 59.00>31.10  |
| Methylbutenol           | 3.437          | 1023            | 71.10>43.10  |
| Ethyl butanoate         | 3.457          | 1024            | 71.00>43.10  |
| Isopropyl butyrate      | 3.515          | 1027            | 71.10>43.10  |
| Propyl propionate       | 3.594          | 1031            | 75.10>57.10  |
| 3-Hexanone              | 3.633          | 1033            | 71.10>43.10  |
| Ethyl 2-methylbutyrate  | 3.751          | 1039            | 102.00>74.00 |
| Camphene                | 3.947          | 1049            | 121.10>93.10 |
| Dimethyl disulfide      | 4.084          | 1056            | 94.00>79.00  |
| Ethyl 3-methylbutanoate | 4.124          | 1058            | 85.10>57.10  |
| Butyl acetate           | 4.143          | 1059            | 73.00>43.00  |
| 2-Hexanone              | 4.182          | 1061            | 100.10>85.10 |
| Hexanal                 | 4.222          | 1063            | 82.10>67.10  |
| S-Ethyl Thioacetate     | 4.32           | 1068            | 104.10>43.10 |
| 2-Methylthiophene       | 4.418          | 1073            | 97.00>53.10  |
| Isobutanol              | 4.438          | 1074            | 43.10>41.10  |

|                            |       |      |              |
|----------------------------|-------|------|--------------|
| 1-Hexen-3-one              | 4.496 | 1077 | 70.10>55.00  |
| Tetrahydrothiophene        | 4.693 | 1087 | 88.00>60.00  |
| 2-Methylpentan-2-ol        | 4.732 | 1089 | 59.10>31.10  |
| beta-Pinene                | 4.81  | 1093 | 93.10>77.10  |
| 3-Pentanol                 | 4.889 | 1097 | 59.10>31.10  |
| Sabinene                   | 5.204 | 1110 | 93.10>77.10  |
| 2-Pentanol                 | 5.255 | 1112 | 73.10>55.10  |
| 2-Methylbutyl acetate      | 5.357 | 1116 | 70.00>55.10  |
| Propyl butyrate            | 5.357 | 1116 | 71.00>43.10  |
| (E)-2-Pentenal             | 5.357 | 1116 | 83.10>55.10  |
| Mesityl oxide              | 5.357 | 1116 | 98.10>83.10  |
| Isoamyl acetate            | 5.383 | 1117 | 70.10>55.10  |
| p-Xylene                   | 5.562 | 1124 | 106.00>91.00 |
| m-Xylene                   | 5.716 | 1130 | 106.00>91.00 |
| Ethyl valerate             | 5.793 | 1133 | 85.10>57.10  |
| 1-Hexanethiol              | 5.844 | 1135 | 118.10>84.10 |
| 1-Butanol                  | 5.869 | 1136 | 56.10>41.10  |
| delta-3-Carene             | 5.921 | 1138 | 136.10>93.10 |
| alpha-Phellandrene         | 6.33  | 1154 | 93.10>77.00  |
| Myrcene                    | 6.484 | 1160 | 93.00>77.10  |
| Pyridine                   | 6.586 | 1164 | 79.10>52.10  |
| Pentyl acetate             | 6.663 | 1167 | 70.10>55.10  |
| 1,4-Cineole                | 6.689 | 1168 | 125.10>43.10 |
| alpha-Terpinene            | 6.689 | 1168 | 121.10>93.10 |
| o-Xylene                   | 6.766 | 1171 | 106.00>91.00 |
| 2-Heptanone                | 6.791 | 1172 | 71.00>43.00  |
| Heptanal                   | 6.868 | 1175 | 70.10>55.10  |
| Methyl hexanoate           | 6.996 | 1180 | 74.00>43.10  |
| 3-Methyl-3-butenyl acetate | 7.098 | 1184 | 68.10>53.10  |
| Ethyl isocaproate          | 7.15  | 1186 | 88.10>70.10  |
| Limonene                   | 7.175 | 1187 | 136.00>93.00 |
| Diethyl disulfide          | 7.329 | 1193 | 122.00>94.00 |
| 1,8-Cineole                | 7.406 | 1196 | 111.10>43.10 |
| 2-Methyl-1-butanol         | 7.431 | 1197 | 70.10>55.10  |
| Isoamyl alcohol            | 7.457 | 1198 | 70.10>55.10  |
| 2-Methylpyridine           | 7.457 | 1198 | 93.10>66.10  |
| trans-2-Hexenal            | 7.529 | 1201 | 69.10>41.10  |
| Butyl 2-methylbutyrate     | 8.056 | 1226 | 85.10>57.10  |
| 2-Pentylfuran              | 8.077 | 1227 | 81.00>53.00  |
| Ethyl hexanoate            | 8.098 | 1228 | 88.00>61.00  |
| (Z)-beta-Ocimene           | 8.098 | 1228 | 93.10>77.10  |
| Isopropyl hexanoate        | 8.119 | 1229 | 99.10>43.10  |
| (Z)-4-Heptenal             | 8.119 | 1229 | 94.10>79.10  |

|                            |        |      |               |
|----------------------------|--------|------|---------------|
| gamma-Terpinene            | 8.288  | 1237 | 93.10>77.10   |
| Styrene                    | 8.33   | 1239 | 104.10>78.10  |
| Prenyl acetate             | 8.351  | 1240 | 86.10>71.10   |
| 1-Pentanol                 | 8.414  | 1243 | 70.00>55.00   |
| 1-Hexen-3-ol               | 8.414  | 1243 | 57.10>31.10   |
| (E)-beta-Ocimene           | 8.456  | 1245 | 93.10>77.10   |
| 3-Octanone                 | 8.519  | 1248 | 71.10>43.10   |
| 2-Methylpyrazine           | 8.561  | 1250 | 94.00>67.00   |
| Isoamyl butyrate           | 8.73   | 1258 | 70.10>55.10   |
| p-Cymene                   | 8.793  | 1261 | 134.10>119.10 |
| Hexyl acetate              | 8.877  | 1265 | 84.10>69.10   |
| 2,4-Dimethylthiazole       | 8.877  | 1265 | 113.00>72.00  |
| 2-Ethylpyridine            | 8.899  | 1266 | 106.10>78.10  |
| 4-Methylthiazole           | 8.92   | 1267 | 99.00>72.00   |
| 1,2,4-Trimethylbenzene     | 8.941  | 1268 | 120.10>105.10 |
| Acetoin                    | 8.941  | 1268 | 45.00>43.00   |
| delta-Terpinene            | 8.983  | 1270 | 136.10>121.10 |
| 2-Octanone                 | 9.109  | 1276 | 128.00>85.00  |
| 3-Mercapto-2-butanone      | 9.151  | 1278 | 104.10>43.00  |
| Octanal                    | 9.193  | 1280 | 84.00>55.00   |
| 3-Heptanol                 | 9.362  | 1288 | 69.10>41.10   |
| 1-Octen-3-one              | 9.425  | 1291 | 70.10>55.00   |
| 2-Methyl-3-furanthiol      | 9.552  | 1297 | 114.00>86.00  |
| trans-2-Penten-1-ol        | 9.633  | 1301 | 57.10>31.00   |
| 2,5-Dimethylpyrazine       | 9.65   | 1302 | 108.10>42.10  |
| 2,6-Dimethylpyrazine       | 9.721  | 1306 | 108.00>42.00  |
| (Z)-2-Penten-1-ol          | 9.739  | 1307 | 57.10>31.00   |
| 3-Methyl-2-buten-1-ol      | 9.739  | 1307 | 71.10>43.10   |
| (3Z)-3-Hexenyl acetate     | 9.757  | 1308 | 82.10>67.10   |
| trans-2-Heptenal           | 9.757  | 1308 | 83.00>55.00   |
| Pentyl butyrate            | 9.792  | 1310 | 71.10>43.10   |
| Propyl hexanoate           | 9.792  | 1310 | 99.10>43.10   |
| 2-Heptanol                 | 9.81   | 1311 | 83.10>55.10   |
| 2-Methoxypyrazine          | 9.917  | 1317 | 110.10>81.10  |
| 2-Ethylpyrazine            | 9.935  | 1318 | 107.00>79.00  |
| 6-Methyl-5-hepten-2-one    | 10.059 | 1325 | 108.10>93.10  |
| Ethyl 2-mercaptopropionate | 10.112 | 1328 | 88.00>60.00   |
| Ethyl heptanoate           | 10.148 | 1330 | 88.10>61.00   |
| 2,3-Dimethylpyrazine       | 10.165 | 1331 | 108.00>67.00  |
| Ethyl lactate              | 10.254 | 1336 | 75.10>45.00   |
| cis-Rose Oxide             | 10.325 | 1340 | 139.10>69.10  |
| 2,6-Dimethyl-5-heptenal    | 10.343 | 1341 | 82.10>67.10   |
| 3-Mercapto-2-pentanone     | 10.361 | 1342 | 75.00>41.00   |

|                                 |        |      |               |
|---------------------------------|--------|------|---------------|
| Allyl isothiocyanate            | 10.45  | 1347 | 99.10>41.10   |
| 1-Hexanol                       | 10.467 | 1348 | 56.10>41.10   |
| 4,5-Dimethylthiazole            | 10.503 | 1350 | 113.00>71.00  |
| trans-3-Hexen-1-ol              | 10.574 | 1354 | 82.10>67.10   |
| trans-Rose Oxide                | 10.574 | 1354 | 139.10>69.10  |
| 2,4,5-Trimethylthiazole         | 10.645 | 1358 | 127.00>86.00  |
| 3-Ethoxy-1-propanol             | 10.698 | 1361 | 71.00>43.10   |
| Methyl cyclohexanecarboxylate   | 10.751 | 1364 | 142.10>113.10 |
| Dimethyl trisulfide             | 10.769 | 1365 | 126.00>79.00  |
| 2-Ethyl-5-methylpyrazine        | 10.769 | 1365 | 121.10>66.10  |
| 4-Mercapto-4-methyl-2-pentanone | 10.769 | 1365 | 132.10>89.10  |
| Heptyl acetate                  | 10.787 | 1366 | 70.10>55.10   |
| cis-3-Hexen-1-ol                | 10.929 | 1374 | 82.10>67.10   |
| 2,5-Dimethylfuran-3-thiol       | 10.929 | 1374 | 128.10>95.10  |
| Benzyl methyl ether             | 10.929 | 1374 | 91.10>65.10   |
| Butyl isothiocyanate            | 10.947 | 1375 | 115.10>100.10 |
| 2-Nonanone                      | 10.982 | 1377 | 71.00>43.00   |
| 2-Ethylhexyl acetate            | 11.018 | 1379 | 70.10>55.10   |
| 2,4-Hexadienal                  | 11.053 | 1381 | 96.00>81.10   |
| Methyl octanoate                | 11.071 | 1382 | 87.00>55.00   |
| 3-Octanol                       | 11.071 | 1382 | 83.10>55.10   |
| Nonanal                         | 11.089 | 1383 | 82.10>67.10   |
| 2,3,5-Trimethylpyrazine         | 11.16  | 1387 | 122.10>42.10  |
| Methyl (methylthio)acetate      | 11.16  | 1387 | 120.00>74.10  |
| 2-Ethyl-3-methylpyrazine        | 11.178 | 1388 | 121.00>93.10  |
| 2-Isobutylthiazole              | 11.231 | 1391 | 99.00>59.00   |
| 2-Methylanisole                 | 11.231 | 1391 | 122.00>107.10 |
| trans-3-Octen-2-one             | 11.249 | 1392 | 111.10>55.10  |
| trans-2-Hexen-1-ol              | 11.302 | 1395 | 82.10>67.10   |
| alpha-Thujone                   | 11.406 | 1401 | 110.10>95.10  |
| (Z)-hex-2-en-1-ol               | 11.422 | 1402 | 82.10>67.10   |
| Butyl hexanoate                 | 11.484 | 1406 | 99.10>43.10   |
| Hexyl butyrate                  | 11.5   | 1407 | 71.10>43.10   |
| 1,2,4,5-Tetramethylbenzene      | 11.531 | 1409 | 119.00>91.00  |
| 2-Octanol                       | 11.562 | 1411 | 97.10>55.10   |
| 2-Mercaptoethyl acetate         | 11.577 | 1412 | 60.00>45.00   |
| trans-2-Octenal                 | 11.608 | 1414 | 83.10>55.10   |
| 2-Cyclohexen-1-one              | 11.624 | 1415 | 96.10>68.00   |
| Furfuryl mercaptan              | 11.639 | 1416 | 114.00>81.10  |
| Hexyl 2-methylbutanoate         | 11.701 | 1420 | 85.10>57.10   |
| alpha,p-Dimethylstyrene         | 11.717 | 1421 | 132.10>117.10 |
| 2-Ethyl-3,6-dimethylpyrazine    | 11.748 | 1423 | 135.10>107.10 |

|                                  |        |      |               |
|----------------------------------|--------|------|---------------|
| 2-Isopropyl-3-methoxypyrazine    | 11.779 | 1425 | 152.00>137.00 |
| Ethyl (methylthio)acetate        | 11.779 | 1425 | 134.10>88.10  |
| Ethyl octanoate                  | 11.841 | 1429 | 88.10>61.00   |
| (Z)-Linalool oxide               | 11.857 | 1430 | 94.10>79.10   |
| Methional                        | 11.857 | 1430 | 104.10>76.10  |
| 2-Methyl-1,3-dithiolane          | 11.888 | 1432 | 120.00>105.00 |
| cis-Limonene oxide               | 11.919 | 1434 | 93.10>77.10   |
| Acetic acid                      | 11.919 | 1434 | 60.00>43.00   |
| Furfural                         | 11.981 | 1438 | 95.00>67.10   |
| 2-Ethyl-3,5-dimethylpyrazine     | 12.012 | 1440 | 135.10>66.00  |
| 1-Octen-3-ol                     | 12.074 | 1444 | 57.10>31.00   |
| 5-Ethyl-2,3-dimethylpyrazine     | 12.089 | 1445 | 135.10>53.10  |
| trans-Limonene oxide             | 12.12  | 1447 | 94.10>79.10   |
| 1-Heptanol                       | 12.136 | 1448 | 70.10>55.10   |
| 2-Pentylthiophene                | 12.136 | 1448 | 97.00>53.10   |
| Menthone                         | 12.136 | 1448 | 112.10>97.10  |
| Isopentyl hexanoate              | 12.198 | 1452 | 99.10>43.10   |
| (Z)-3-hexenyl butyrate           | 12.198 | 1452 | 82.10>67.10   |
| (E)-Linalool oxide               | 12.291 | 1458 | 94.10>79.10   |
| cis-3-Hexenyl 2-methylbutanoate  | 12.462 | 1469 | 82.10>67.10   |
| Citronellal                      | 12.462 | 1469 | 121.10>93.10  |
| Octyl acetate                    | 12.478 | 1470 | 56.10>41.10   |
| 2,4-Heptadienal                  | 12.54  | 1474 | 81.00>53.10   |
| Isomenthone                      | 12.571 | 1476 | 112.10>97.10  |
| 2-Ethylhexanol                   | 12.586 | 1477 | 83.10>55.10   |
| 2,3-Diethyl-5-methylpyrazine     | 12.586 | 1477 | 150.10>135.10 |
| Methyl nonanoate                 | 12.71  | 1485 | 71.10>43.10   |
| 2-Acetylfuran                    | 12.726 | 1486 | 110.10>95.00  |
| 2-Sec-Butyl-3-methoxypyrazine    | 12.788 | 1490 | 138.00>123.10 |
| n-Decanal                        | 12.804 | 1491 | 112.00>70.00  |
| 2-(Methylthio)ethanol            | 12.912 | 1498 | 92.00>61.10   |
| Camphor                          | 12.985 | 1503 | 108.10>93.10  |
| Ethyl 3-hydroxybutyrate          | 12.985 | 1503 | 117.10>71.00  |
| Benzaldehyde                     | 13.014 | 1505 | 105.00>77.00  |
| 3-Mercapto-3-methylbutyl formate | 13.028 | 1506 | 69.10>41.10   |
| 2-Nonanol                        | 13.07  | 1509 | 69.10>41.10   |
| 4-(Methylthio)-2-butanone        | 13.07  | 1509 | 118.10>71.10  |
| 2-Methyltetrahydrothiophen-3-one | 13.084 | 1510 | 116.10>60.00  |
| Furfuryl Acetate                 | 13.126 | 1513 | 140.10>98.10  |
| Propanoic acid                   | 13.196 | 1518 | 74.00>56.00   |
| (E)-2-Nonenal                    | 13.21  | 1519 | 96.10>81.10   |

|                                               |        |      |               |
|-----------------------------------------------|--------|------|---------------|
| 4-Pentenyl isothiocyanate                     | 13.238 | 1521 | 99.00>72.00   |
| Ethyl nonanoate                               | 13.337 | 1528 | 88.10>61.10   |
| Ethyl DL-Leucate                              | 13.351 | 1529 | 87.10>69.10   |
| Linalool                                      | 13.506 | 1540 | 71.00>43.00   |
| Dimethyl sulfoxide                            | 13.534 | 1542 | 133.10>115.10 |
| Ethyl 3-(methylthio)propionate                | 13.576 | 1545 | 148.10>74.10  |
| 1-Octanol                                     | 13.59  | 1546 | 69.00>41.00   |
| Isobutyric acid                               | 13.604 | 1547 | 73.10>55.00   |
| Linalyl acetate                               | 13.632 | 1549 | 93.10>77.10   |
| 5-Methyl furfural                             | 13.745 | 1557 | 110.00>53.00  |
| 2-Pentylpyridine                              | 13.773 | 1559 | 93.10>66.10   |
| Diethyl malonate                              | 13.871 | 1566 | 133.10>115.10 |
| Fenchol                                       | 13.927 | 1570 | 107.10>91.10  |
| 2,5-Dimethyl-4-methoxy-3(2H)-furanone         | 13.927 | 1570 | 142.10>85.00  |
| Nonyl acetate                                 | 13.956 | 1572 | 97.10>55.10   |
| (2E,6Z)-nona-2,6-dienal                       | 13.956 | 1572 | 70.10>42.10   |
| 2-Acetylpyridine                              | 14.138 | 1585 | 79.10>52.00   |
| Terpinen-4-ol                                 | 14.152 | 1586 | 136.10>93.10  |
| Benzonitrile                                  | 14.166 | 1587 | 103.10>76.10  |
| Methyl decanoate                              | 14.18  | 1588 | 87.00>55.00   |
| 2-Undecanone                                  | 14.18  | 1588 | 71.00>43.00   |
| (+)-Dihydrocarvone                            | 14.209 | 1590 | 152.10>109.10 |
| beta-Caryophyllene                            | 14.223 | 1591 | 133.10>105.10 |
| Undecanal                                     | 14.251 | 1593 | 82.10>67.10   |
| (E)-2-Octen-1-ol                              | 14.335 | 1599 | 81.10>79.10   |
| 5-Methyl-6,7-dihydro-5H-cyclopenta[b]pyrazine | 14.335 | 1599 | 134.10>119.10 |
| Hexyl hexanoate                               | 14.388 | 1603 | 99.10>43.10   |
| 3-(Methylthio)propyl acetate                  | 14.414 | 1605 | 88.00>73.10   |
| Methyl benzoate                               | 14.427 | 1606 | 105.10>77.10  |
| Butyl octanoate                               | 14.44  | 1607 | 127.10>57.10  |
| Butyric acid                                  | 14.48  | 1610 | 60.00>42.00   |
| (+)-Isodihydrocarvone                         | 14.48  | 1610 | 152.10>95.10  |
| cis-beta-Terpineol                            | 14.493 | 1611 | 121.10>93.10  |
| Acetylpyrazine                                | 14.493 | 1611 | 122.10>94.10  |
| Benzyl mercaptan                              | 14.519 | 1613 | 124.00>91.00  |
| Methyl nerate                                 | 14.623 | 1621 | 114.10>83.10  |
| 2-Acetylthiazole                              | 14.623 | 1621 | 127.00>99.10  |
| L-Menthol                                     | 14.714 | 1628 | 95.00>67.00   |
| Phenylacetaldehyde                            | 14.753 | 1631 | 91.10>65.10   |
| Ethyl decanoate                               | 14.779 | 1633 | 101.10>73.10  |
| (Z)-2-Decenal                                 | 14.792 | 1634 | 83.10>55.10   |



|                                   |        |      |               |
|-----------------------------------|--------|------|---------------|
| Acetophenone                      | 14.792 | 1634 | 105.00>77.00  |
| trans-2-Decenal                   | 14.806 | 1635 | 107.00>79.00  |
| 1-Nonanol                         | 14.871 | 1640 | 70.10>55.10   |
| 3-Mercapto-3-methyl-1-butanol     | 14.871 | 1640 | 86.10>71.10   |
| Isopropyl benzoate                | 14.884 | 1641 | 105.00>77.10  |
| Furfuryl alcohol                  | 14.884 | 1641 | 98.10>42.10   |
| Methyl 2-octynoate                | 14.897 | 1642 | 95.10>67.10   |
| (Z)-3-Hexenyl hexanoate           | 14.988 | 1649 | 82.10>67.10   |
| Citronellyl acetate               | 15.014 | 1651 | 123.10>81.10  |
| Isovaleric acid                   | 15.027 | 1652 | 60.00>42.00   |
| Isoamyl octanoate                 | 15.04  | 1653 | 70.10>55.10   |
| 2-Methyl butyric acid             | 15.053 | 1654 | 74.00>56.00   |
| Isoborneol                        | 15.079 | 1656 | 110.10>95.10  |
| Methyl 2-methyl-3-furyl disulfide | 15.092 | 1657 | 160.00>112.00 |
| 4-Methoxystyrene                  | 15.105 | 1658 | 134.10>91.10  |
| Ethyl benzoate                    | 15.131 | 1660 | 105.00>77.10  |
| trans-beta-Terpineol              | 15.145 | 1661 | 136.10>107.20 |
| beta-Farnesene                    | 15.158 | 1662 | 93.10>77.10   |
| Dihydrocarvyl acetate             | 15.158 | 1662 | 107.10>91.10  |
| Estragole                         | 15.171 | 1663 | 148.10>117.10 |
| Diethyl succinate                 | 15.171 | 1663 | 129.00>101.10 |
| Ethyl 3-hydroxyhexanoate          | 15.197 | 1665 | 89.10>45.00   |
| alpha-Humulene                    | 15.21  | 1666 | 93.10>77.10   |
| 3-(Acetylthio)-2-methylfuran      | 15.223 | 1667 | 156.10>114.00 |
| alpha-Terpinyol acetate           | 15.249 | 1669 | 121.10>93.10  |
| Decyl acetate                     | 15.288 | 1672 | 97.10>55.10   |
| Neral                             | 15.288 | 1672 | 94.10>79.10   |
| 2-Formylthiophene                 | 15.327 | 1675 | 111.00>39.10  |
| Linalyl butyrate                  | 15.366 | 1678 | 93.10>77.10   |
| alpha-Terpineol                   | 15.366 | 1678 | 136.00>121.00 |
| gamma-Terpineol                   | 15.405 | 1681 | 121.10>93.10  |
| Borneol                           | 15.405 | 1681 | 110.10>95.10  |
| Methyl geranate                   | 15.431 | 1683 | 114.10>83.10  |
| 2-Thiophenemethanethiol           | 15.431 | 1683 | 97.00>53.10   |
| (E,E)-2,4-nonadienal              | 15.523 | 1690 | 81.00>53.00   |
| gamma-Caprolactone                | 15.523 | 1690 | 85.00>57.10   |
| Methionol                         | 15.64  | 1699 | 106.10>58.00  |
| 2-Phenylethanethiol               | 15.653 | 1700 | 91.10>65.10   |
| n-Dodecanal                       | 15.665 | 1701 | 110.00>67.00  |
| Linalyl isovalerate               | 15.714 | 1705 | 93.10>77.10   |
| 3-Methyl-2(5H)-furanone           | 15.714 | 1705 | 69.10>41.10   |
| 3-Methyl-2,4-nonanedione          | 15.727 | 1706 | 99.10>43.10   |
| 3-Mercaptohexyl acetate           | 15.751 | 1708 | 88.10>59.00   |

|                                    |        |      |               |
|------------------------------------|--------|------|---------------|
| Valencene                          | 15.763 | 1709 | 161.20>105.10 |
| Neodihydrocarveol                  | 15.776 | 1710 | 136.10>107.20 |
| Piperitone                         | 15.776 | 1710 | 110.10>95.10  |
| Neryl acetate                      | 15.812 | 1713 | 93.10>77.10   |
| Benzyl acetate                     | 15.812 | 1713 | 150.10>108.10 |
| Valeric acid                       | 15.824 | 1714 | 60.00>42.00   |
| (-)-Carvone                        | 15.849 | 1716 | 108.10>93.10  |
| d-Carvone                          | 15.849 | 1716 | 108.10>93.10  |
| Geranial                           | 15.922 | 1722 | 94.10>79.10   |
| Epoxylinolol isomer-1              | 15.922 | 1722 | 94.10>79.10   |
| 4-Ethylbenzaldehyde                | 15.935 | 1723 | 134.00>105.10 |
| Naphthalene                        | 15.971 | 1726 | 128.00>102.00 |
| Dihydrocarveol                     | 16.069 | 1734 | 121.00>93.10  |
| Ethyl undecanoate                  | 16.082 | 1735 | 101.10>73.00  |
| 2-Acetyl-2-thiazoline              | 16.082 | 1735 | 129.00>101.10 |
| trans-2-Undecenal                  | 16.167 | 1742 | 83.10>55.10   |
| Methyl 2-nonynoate                 | 16.192 | 1744 | 107.10>79.10  |
| Geranyl acetate                    | 16.192 | 1744 | 136.10>121.20 |
| Epoxylinolol isomer-2              | 16.216 | 1746 | 94.10>79.10   |
| 1-Decanol                          | 16.278 | 1751 | 83.10>55.10   |
| 2,6-Nonadienol                     | 16.302 | 1753 | 69.10>41.00   |
| Furfuryl thioacetate               | 16.302 | 1753 | 81.10>53.10   |
| 5-Methyl-2-thiophenecarboxaldehyde | 16.302 | 1753 | 125.00>53.10  |
| Cuminaldehyde                      | 16.327 | 1755 | 133.10>105.20 |
| Citronellol                        | 16.339 | 1756 | 82.10>67.10   |
| p-Acetyltoluene                    | 16.339 | 1756 | 119.10>91.10  |
| Carvyl acetate                     | 16.351 | 1757 | 152.10>109.10 |
| 2-Acetylthiophene                  | 16.388 | 1760 | 126.00>111.00 |
| Methyl salicylate                  | 16.425 | 1763 | 120.00>92.00  |
| Neoisodihydrocarveol               | 16.461 | 1766 | 136.00>107.10 |
| Ethyl phenylacetate                | 16.535 | 1772 | 91.10>65.10   |
| Perillaldehyde                     | 16.547 | 1773 | 122.10>107.10 |
| gamma-Heptalactone                 | 16.621 | 1779 | 85.00>57.10   |
| Nerol                              | 16.682 | 1784 | 93.10>77.10   |
| Methyl furfuryl disulfide          | 16.706 | 1786 | 81.10>53.10   |
| Isodihydrocarveol                  | 16.755 | 1790 | 121.10>93.10  |
| Ethyl nicotinate                   | 16.78  | 1792 | 106.00>78.00  |
| Methyl laurate                     | 16.817 | 1795 | 87.00>55.00   |
| 2,4-Decadienal                     | 16.829 | 1796 | 81.00>53.10   |
| Cyclotene                          | 16.853 | 1798 | 112.10>84.10  |
| Geranyl isobutyrate                | 16.878 | 1800 | 93.10>77.10   |
| Ethyl salicylate                   | 16.878 | 1800 | 120.00>92.10  |

|                               |        |      |               |
|-------------------------------|--------|------|---------------|
| 2-Phenylethyl acetate         | 16.889 | 1801 | 104.00>78.10  |
| Hexyl octanoate               | 16.924 | 1804 | 127.10>57.10  |
| beta-Damascenone              | 16.924 | 1804 | 121.10>105.10 |
| (E)-beta-Damascone            | 16.982 | 1809 | 192.20>177.20 |
| Butyl decanoate               | 17.017 | 1812 | 173.20>43.10  |
| cis-Geranylacetone            | 17.052 | 1815 | 151.20>93.10  |
| (E)-carveol                   | 17.064 | 1816 | 109.10>94.00  |
| 3-Mercapto-1-hexanol          | 17.145 | 1823 | 82.10>67.10   |
| Capronic acid                 | 17.168 | 1825 | 73.00>55.00   |
| trans-p-Methane-8-thiol-3-one | 17.25  | 1832 | 112.10>97.10  |
| p-Cymenol                     | 17.261 | 1833 | 135.10>43.10  |
| Guaiacol                      | 17.273 | 1834 | 109.10>81.10  |
| Geraniol                      | 17.296 | 1836 | 69.10>41.10   |
| Ethyl laurate                 | 17.32  | 1838 | 88.10>61.00   |
| trans-Geranylacetone          | 17.354 | 1841 | 151.20>93.10  |
| alpha-Ionone                  | 17.378 | 1843 | 121.00>77.00  |
| Alpha-isomethylionone         | 17.389 | 1844 | 150.10>135.10 |
| 2-Dodecenal                   | 17.424 | 1847 | 121.00>93.10  |
| (Z)-carveol                   | 17.424 | 1847 | 134.10>119.10 |
| Neryl butyrate                | 17.447 | 1849 | 93.10>77.00   |
| 1-Undecanol                   | 17.494 | 1853 | 83.00>55.00   |
| Butyl benzoate                | 17.506 | 1854 | 105.10>77.10  |
| Safrole                       | 17.506 | 1854 | 162.10>104.10 |
| Benzyl butyrate               | 17.575 | 1860 | 108.10>79.10  |
| cis-p-Methane-8-thiol-3-one   | 17.587 | 1861 | 112.10>97.10  |
| Benzyl alcohol                | 17.61  | 1863 | 79.00>77.10   |
| Ethyl 3-phenylpropionate      | 17.622 | 1864 | 178.10>104.10 |
| 12-Methyltridecanal           | 17.633 | 1865 | 82.00>67.10   |
| (E)-Whiskey lactone           | 17.645 | 1866 | 99.10>43.10   |
| Neryl isovalerate             | 17.703 | 1871 | 121.10>93.10  |
| 5-Methylhexanoic acid         | 17.831 | 1882 | 87.10>45.10   |
| Geranyl butyrate              | 17.843 | 1883 | 93.10>77.10   |
| 2-Phenylethanol               | 17.959 | 1893 | 91.00>65.00   |
| gamma-Octalactone             | 18.017 | 1898 | 85.00>57.00   |
| Butylated hydroxytoluene      | 18.051 | 1901 | 220.00>205.00 |
| Geranyl isovalerate           | 18.129 | 1908 | 121.10>93.10  |
| Tetradecanal                  | 18.173 | 1912 | 96.00>81.10   |
| cis-Jasmone                   | 18.229 | 1917 | 164.10>122.10 |
| beta-Ionone                   | 18.339 | 1927 | 177.00>162.00 |
| Hydroxycitronellal            | 18.339 | 1927 | 96.10>81.10   |
| (Z)-whiskey lactone           | 18.428 | 1935 | 99.00>43.10   |
| Maltol                        | 18.472 | 1939 | 126.00>71.00  |
| delta-Octalactone             | 18.483 | 1940 | 114.10>71.10  |

|                                |        |      |               |
|--------------------------------|--------|------|---------------|
| Benzothiazole                  | 18.494 | 1941 | 135.00>108.00 |
| (E)-2-Hexenoic acid            | 18.539 | 1945 | 73.10>55.00   |
| 2-Acetylpyrrole                | 18.55  | 1946 | 109.10>94.10  |
| 1-Dodecanol                    | 18.594 | 1950 | 97.10>55.10   |
| 2-Methylquinoxaline            | 18.605 | 1951 | 144.10>117.10 |
| Furaneol acetate               | 18.694 | 1959 | 128.10>85.00  |
| Caryophyllene oxide            | 18.815 | 1970 | 161.10>105.10 |
| o-Cresol                       | 18.926 | 1980 | 108.00>77.00  |
| Phenol                         | 18.959 | 1983 | 94.00>66.00   |
| (Z)-Nerolidol                  | 18.981 | 1985 | 136.20>121.10 |
| Methyl eugenol                 | 19.158 | 2001 | 178.10>107.10 |
| Methyl myristate               | 19.169 | 2002 | 87.10>55.00   |
| 4-Ethyl-2-methoxyphenol        | 19.19  | 2004 | 152.10>137.10 |
| (E)-2-dodecen-1-ol             | 19.211 | 2006 | 96.10>81.10   |
| Furaneol                       | 19.211 | 2006 | 128.10>85.10  |
| 4-Methoxybenzaldehyde          | 19.232 | 2008 | 135.10>77.10  |
| gamma-Nonalactone              | 19.253 | 2010 | 85.00>57.10   |
| 2-Propionylpyrrole             | 19.275 | 2012 | 123.00>94.10  |
| Pantolactone                   | 19.306 | 2015 | 71.10>43.10   |
| Butyl laurate                  | 19.317 | 2016 | 201.00>57.10  |
| Diethyl malate                 | 19.327 | 2017 | 117.10>71.10  |
| trans-Cinnamaldehyde           | 19.327 | 2017 | 103.10>77.10  |
| Pentadecanal                   | 19.338 | 2018 | 96.10>81.10   |
| 3-Phenyl-1-propanol            | 19.402 | 2024 | 117.10>115.10 |
| (E)-Nerolidol                  | 19.412 | 2025 | 136.20>121.10 |
| Caprylic acid                  | 19.508 | 2034 | 101.10>55.10  |
| Lilial                         | 19.561 | 2039 | 189.10>131.10 |
| Ethyl myristate                | 19.603 | 2043 | 101.10>73.10  |
| p-Cresol                       | 19.677 | 2050 | 107.10>77.10  |
| 1-Tridecanol                   | 19.709 | 2053 | 97.10>55.10   |
| Methyl cinnamate               | 19.772 | 2059 | 131.10>103.10 |
| Homofuraneol                   | 19.783 | 2060 | 142.10>127.10 |
| 4-Propylguaiacol               | 20.016 | 2082 | 137.10>122.10 |
| Ethyl cinnamate                | 20.349 | 2114 | 131.10>103.10 |
| Hexadecanal                    | 20.47  | 2126 | 82.10>67.10   |
| gamma-Decalactone              | 20.491 | 2128 | 85.00>57.00   |
| 4-Ethylphenol                  | 20.521 | 2131 | 107.10>77.10  |
| Bis(2-methyl-3-furyl)disulfide | 20.562 | 2135 | 226.00>113.00 |
| Nonanoic acid                  | 20.612 | 2140 | 129.10>87.10  |
| Thymol                         | 20.653 | 2144 | 150.10>135.10 |
| Eugenol                        | 20.764 | 2155 | 164.10>149.10 |
| 3-Ethylphenol                  | 20.785 | 2157 | 107.10>77.10  |
| p-Vinylguaiacol                | 20.785 | 2157 | 150.10>135.10 |

|                                           |        |      |               |
|-------------------------------------------|--------|------|---------------|
| 1-Tetradecanol                            | 20.795 | 2158 | 111.00>69.00  |
| delta-Decalactone                         | 20.856 | 2164 | 99.10>71.10   |
| Sotolon                                   | 20.967 | 2175 | 83.00>55.10   |
| o-Aminoacetophenone                       | 21.16  | 2194 | 135.10>120.10 |
| alpha-Bisabolol                           | 21.23  | 2201 | 109.10>67.10  |
| Massoia lactone                           | 21.308 | 2209 | 97.00>69.10   |
| Methyl palmitate                          | 21.318 | 2210 | 87.10>55.00   |
| Methyl anthranilate                       | 21.377 | 2216 | 119.00>92.10  |
| beta-Eudesmol                             | 21.416 | 2220 | 108.10>93.10  |
| 5-Ethyl-3-hydroxy-4-methylfuran-2(5H)-one | 21.416 | 2220 | 97.10>69.10   |
| 2,6-Dimethoxyphenol                       | 21.552 | 2234 | 154.10>139.10 |
| Isopropyl palmitate                       | 21.562 | 2235 | 102.10>60.00  |
| gamma-Undecalactone                       | 21.63  | 2242 | 85.00>57.10   |
| Ethyl palmitate                           | 21.699 | 2249 | 101.10>73.10  |
| Capric acid                               | 21.699 | 2249 | 129.00>87.00  |
| alpha-Amylcinnamaldehyde                  | 21.709 | 2250 | 202.10>129.10 |
| Neric acid                                | 21.738 | 2253 | 100.10>82.10  |
| Sulfurol                                  | 21.816 | 2261 | 143.10>112.00 |
| 4-Methoxybenzyl alcohol                   | 21.826 | 2262 | 109.00>77.10  |
| Cinnamyl alcohol                          | 21.884 | 2268 | 134.10>92.10  |
| delta-Undecalactone                       | 22.06  | 2286 | 99.10>71.10   |
| Geranic acid                              | 22.148 | 2295 | 100.10>82.10  |
| Farnesol isomer-1                         | 22.215 | 2302 | 93.00>77.10   |
| Diethyl L-tartrate                        | 22.243 | 2305 | 104.10>76.00  |
| Farnesol isomer-2                         | 22.337 | 2315 | 81.00>41.10   |
| Methyl jasmonate                          | 22.374 | 2319 | 156.10>83.10  |
| Isoeugenol                                | 22.515 | 2334 | 164.10>149.10 |
| Octadecanal                               | 22.543 | 2337 | 124.20>82.10  |
| trans,trans-Farnesol                      | 22.59  | 2342 | 93.00>77.10   |
| alpha-Hexylcinnamaldehyde                 | 22.684 | 2352 | 145.00>117.10 |
| Undecanoic acid                           | 22.749 | 2359 | 129.10>87.10  |
| 1-Hexadecanol                             | 22.796 | 2364 | 111.10>69.10  |
| gamma-Dodecalactone                       | 22.815 | 2366 | 85.00>57.10   |
| delta-Dodecalactone                       | 23.151 | 2402 | 99.10>71.10   |
| Benzoic acid                              | 23.269 | 2415 | 122.10>105.10 |
| Methyl stearate                           | 23.287 | 2417 | 143.10>55.10  |
| Indole                                    | 23.35  | 2424 | 117.00>90.00  |
| Coumarin                                  | 23.503 | 2441 | 146.00>118.10 |
| Ethyl stearate                            | 23.621 | 2454 | 101.10>73.10  |
| Lauric acid                               | 23.684 | 2461 | 157.00>87.00  |
| 5-Hydroxymethylfurfural                   | 23.693 | 2462 | 97.00>69.10   |
| Lyrar                                     | 23.711 | 2464 | 136.10>79.10  |

|                            |        |      |               |
|----------------------------|--------|------|---------------|
| Skatole                    | 23.783 | 2472 | 130.00>77.00  |
| 6-Methoxyeugenol           | 23.982 | 2494 | 194.10>91.10  |
| Nootkatone                 | 24.088 | 2506 | 133.10>105.10 |
| alpha-Amylcinnamyl alcohol | 24.228 | 2522 | 133.00>55.00  |
| Styrene glycol             | 24.28  | 2528 | 107.00>79.10  |
| Vanillin                   | 24.349 | 2536 | 152.00>123.00 |
| Methyl vanillate           | 24.576 | 2562 | 182.00>151.10 |
| Stearyl alcohol            | 24.645 | 2570 | 111.10>69.10  |
| Hydrocinnamic acid         | 24.915 | 2601 | 150.10>104.10 |
| Ethyl vanillate            | 24.933 | 2603 | 151.00>123.10 |
| Acetovanillone             | 24.933 | 2603 | 166.10>151.10 |
| Methyl arachidate          | 25.121 | 2624 | 143.10>55.10  |
| Benzyl benzoate            | 25.13  | 2625 | 105.00>77.10  |
| Ethyl arachidate           | 25.426 | 2658 | 157.10>129.10 |
| Benzyl salicylate          | 26.658 | 2784 | 91.00>65.10   |
| Cinnamic acid              | 27.095 | 2823 | 147.00>91.00  |
| Methyl docosanoate         | 27.178 | 2830 | 354.40>101.10 |
| Ethyl docosanoate          | 27.558 | 2862 | 157.10>129.10 |
| 7-Methoxycoumarin          | 27.962 | 2896 | 176.10>148.10 |
| Tyrosol                    | 28.38  | 2926 | 107.10>77.10  |
| Raspberry ketone           | 28.422 | 2929 | 107.10>77.10  |

**Table S2** List of compounds identified in agarwood samples by SCAN mode.

| RT    | Compound                                                                                                       | Formula                                       | m/z    | CAS         | Type                |
|-------|----------------------------------------------------------------------------------------------------------------|-----------------------------------------------|--------|-------------|---------------------|
| 8.44  | Styrene                                                                                                        | C <sub>8</sub> H <sub>8</sub>                 | 104.15 | 100-42-5    | Aromatics           |
| 10.52 | 4-hydroxy-4-methyl-2-Pentanone                                                                                 | C <sub>6</sub> H <sub>12</sub> O <sub>2</sub> | 116.16 | 123-42-4    | Aliphatic ketones   |
| 11.14 | Nonanal                                                                                                        | C <sub>9</sub> H <sub>18</sub> O              | 142.24 | 124-19-6    | Aliphatic aldehydes |
| 11.39 | Tetradecane                                                                                                    | C <sub>14</sub> H <sub>30</sub>               | 198.39 | 629-59-4    | Alkanes             |
| 11.76 | 1-methoxy-4-methyl-Benzene                                                                                     | C <sub>8</sub> H <sub>10</sub> O              | 122.16 | 104-83-8    | Aromatics           |
| 12.70 | 2-ethyl-1-hexanol                                                                                              | C <sub>8</sub> H <sub>18</sub> O              | 130.23 | 104-76-7    | Aliphatic alcohols  |
| 12.93 | Hexadecane                                                                                                     | C <sub>16</sub> H <sub>34</sub>               | 226.44 | 544-76-3    | Alkanes             |
| 13.03 | Phenylglyoxal                                                                                                  | C <sub>8</sub> H <sub>6</sub> O <sub>2</sub>  | 134.13 | 1074-12-0   | Aromatics           |
| 13.51 | Linalool                                                                                                       | C <sub>10</sub> H <sub>18</sub> O             | 154.25 | 78-70-6     | Aliphatic alcohols  |
| 13.66 | 1-Octanol                                                                                                      | C <sub>8</sub> H <sub>18</sub> O              | 130.22 | 111-87-5    | Aliphatic alcohols  |
| 13.80 | 2-epi-.alpha.-Funebrene                                                                                        | C <sub>15</sub> H <sub>24</sub>               | 204.35 | 854154-70-4 | Sesquiterpenes      |
| 13.90 | Hexadecane, 2,6,10,14-tetramethyl-                                                                             | C <sub>20</sub> H <sub>42</sub>               | 282.50 | 638-36-8    | Alkanes             |
| 14.13 | $\alpha$ -Guaiene                                                                                              | C <sub>15</sub> H <sub>24</sub>               | 204.35 | 3691-12-1   | Sesquiterpenes      |
| 14.35 | Hexacosane                                                                                                     | C <sub>26</sub> H <sub>54</sub>               | 366.7  | 630-01-3    | Alkanes             |
| 14.79 | (3S,3aS,6R,8aS)-3,8,8-Trimethyl-7-methyleneoctahydro-1H-3a,6-methanoazulene (Preziza-7(15)-ene)                | C <sub>15</sub> H <sub>24</sub>               | 204.35 | 31145-21-8  | Sesquiterpenes      |
| 14.82 | Acetophenone                                                                                                   | C <sub>8</sub> H <sub>8</sub> O               | 120.15 | 98-86-2     | Aromatics           |
| 14.91 | Eicosane                                                                                                       | C <sub>20</sub> H <sub>42</sub>               | 282.50 | 112-95-8    | Alkanes             |
| 15.17 | 2-hydroxy-benzaldehyde                                                                                         | C <sub>7</sub> H <sub>6</sub> O <sub>2</sub>  | 122.12 | 1990-2-8    | Aromatics           |
| 15.18 | Benzene, 1-ethenyl-4-methoxy-                                                                                  | C <sub>9</sub> H <sub>10</sub> O              | 134.17 | 637-69-4    | Aromatics           |
| 15.27 | 4a,8-Dimethyl-2-(prop-1-en-2-yl)-1,2,3,4,4a,5,6,7-octahydronaphthalene                                         | C <sub>15</sub> H <sub>24</sub>               | 204.35 | 103827-22-1 | Sesquiterpenes      |
| 15.40 | (4S,4aR,6R)-4,4a-Dimethyl-6-(prop-1-en-2-yl)-1,2,3,4,4a,5,6,7-octahydronaphthalene                             | C <sub>15</sub> H <sub>24</sub>               | 204.35 | 54868-40-5  | Sesquiterpenes      |
| 15.63 | Aristolochene                                                                                                  | C <sub>15</sub> H <sub>24</sub>               | 204.35 | 26620-71-3  | Sesquiterpenes      |
| 15.70 | Naphthalene, 1,2,3,5,6,7,8,8a-octahydro-1,8a-dimethyl-7-(1-methylethenyl)-, [1R-(1.alpha.,7.beta.,8a.alpha.)]- | C <sub>15</sub> H <sub>24</sub>               | 204.35 | 4630-7-3    | Sesquiterpenes      |
| 15.80 | Azulene, 1,2,3,5,6,7,8,8a-octahydro-1,4-dimethyl-7-(1-methylethenyl)-, [1S-(1.alpha.,7.alpha.,8a.beta.)]-      | C <sub>15</sub> H <sub>24</sub>               | 204.35 | 3691-11-0   | Sesquiterpenes      |

|       |                                                                                                                                                       |                                                |        |             |                       |
|-------|-------------------------------------------------------------------------------------------------------------------------------------------------------|------------------------------------------------|--------|-------------|-----------------------|
|       | ( $\alpha$ -Bulnesene)                                                                                                                                |                                                |        |             |                       |
| 15.89 | 2H-3,9a-Methano-1-benzoxepin,<br>octahydro-2,2,5a,9-tetramethyl-, [3R-<br>(3.alpha.,5a.alpha.,9.alpha.,9a.alpha.)]-<br>(Dihydro- $\beta$ -agarofuran) | C <sub>15</sub> H <sub>26</sub> O              | 222.37 | 5956-09-2   | Sesquiterpenes        |
| 16.00 | 1,1,4,7-Tetramethyldecahydro-1H-<br>cyclopropa[e]azulene-4,7-diol<br>(Aromadendrane-4,10-diol)                                                        | C <sub>15</sub> H <sub>26</sub> O <sub>2</sub> | 238.37 | 136458-41-8 | Sesquiterpenes        |
| 16.16 | 3,5,11-Eudesmatriene                                                                                                                                  | C <sub>15</sub> H <sub>22</sub>                | 202.33 | 193615-7-5  | Sesquiterpenes        |
| 16.48 | Benzene, 1-(1,5-dimethyl-4-hexenyl)-4-<br>methyl-<br>( $\alpha$ -Curcumene)                                                                           | C <sub>15</sub> H <sub>22</sub>                | 202.33 | 644-30-4    | Aromatics             |
| 16.71 | Ethanol, 2-(2-butoxyethoxy)-                                                                                                                          | C <sub>8</sub> H <sub>18</sub> O <sub>3</sub>  | 162.23 | 112-34-5    | Aliphatic<br>alcohols |
| 17.05 | (2R,8R,8aS)-8,8a-Dimethyl-2-(prop-1-<br>en-2-yl)-1,2,3,7,8,8a-<br>hexahydronaphthalene<br>(-)-Nootkatene)                                             | C <sub>15</sub> H <sub>22</sub>                | 202.33 | 5090-61-9   | Sesquiterpenes        |
| 17.41 | 4-Phenyl-2-Butanone                                                                                                                                   | C <sub>10</sub> H <sub>12</sub> O              | 148.20 | 2550-26-7   | Aromatics             |
| 17.80 | 10,11-Epoxycalamenene                                                                                                                                 | C <sub>15</sub> H <sub>20</sub> O              | 216.32 | 143785-42-6 | Sesquiterpenes        |
| 18.00 | Phenylethyl Alcohol                                                                                                                                   | C <sub>8</sub> H <sub>10</sub> O               | 122.16 | 1960-12-8   | Aromatics             |
| 18.95 | 3-Buten-2-one, 4-(2,6,6-trimethyl-1-<br>cyclohexen-1-yl)-<br>( $\beta$ -Ionone)                                                                       | C <sub>13</sub> H <sub>20</sub> O              | 192.3  | 14901-7-6   | Sesquiterpenes        |
| 19.26 | 4-Methoxybenzaldehyde                                                                                                                                 | C <sub>8</sub> H <sub>8</sub> O <sub>2</sub>   | 136.15 | 123-11-5    | Aromatics             |
| 19.91 | Cyclohexanemethanol, 4-ethenyl-<br>.alpha.,.alpha.,4-trimethyl-3-(1-<br>methylethenyl)-, [1R-<br>(1.alpha.,3.alpha.,4.beta.)]-                        | C <sub>15</sub> H <sub>26</sub> O              | 222.37 | 639-99-6    | Sesquiterpenes        |
| 20.23 | 2-Naphthalenemethanol,<br>1,2,3,4,4a,5,6,7-octahydro-<br>.alpha.,.alpha.,4a,8-tetramethyl-, (2R-<br>cis)-<br>( $\gamma$ -Eudesmol)                    | C <sub>15</sub> H <sub>26</sub> O              | 222.37 | 1209-71-8   | Sesquiterpenes        |
| 20.36 | Cedrol                                                                                                                                                | C <sub>15</sub> H <sub>26</sub> O              | 222.37 | 77-53-2     | Sesquiterpenes        |
| 20.44 | $\alpha$ -Santalol                                                                                                                                    | C <sub>15</sub> H <sub>24</sub> O              | 220.35 | 115-71-9    | Sesquiterpenes        |
| 20.58 | 2-Furanmethanol, tetrahydro-<br>.alpha.,.alpha.,5-trimethyl-5-(4-methyl-<br>3-cyclohexen-1-yl)-, [2S-<br>[2.alpha.,5.beta.(R*)]]-                     | C <sub>15</sub> H <sub>26</sub> O <sub>2</sub> | 238.37 | 26184-88-3  | Sesquiterpenes        |
| 20.69 | 1H-Benzocyclohepten-7-ol,<br>2,3,4,4a,5,6,7,8-octahydro-1,1,4a,7-<br>tetramethyl-, cis-                                                               | C <sub>15</sub> H <sub>26</sub> O              | 222.37 | 6892-80-4   | Sesquiterpenes        |



|       |                                                                                                                                                         |                                                |        |             |                    |
|-------|---------------------------------------------------------------------------------------------------------------------------------------------------------|------------------------------------------------|--------|-------------|--------------------|
| 20.92 | Agarospirol                                                                                                                                             | C <sub>15</sub> H <sub>26</sub> O              | 222.37 | 1460-73-7   | Sesquiterpenes     |
| 21.06 | (3S,3aS,6R,7S,8aS)-3,7,8,8-Tetramethyloctahydro-1H-3a,6-methanoazulen-7-ol<br>(Prezizaan-7-ol)                                                          | C <sub>15</sub> H <sub>26</sub> O              | 222.37 | 312296-11-0 | Sesquiterpenes     |
| 21.18 | (-)-Aristolene                                                                                                                                          | C <sub>15</sub> H <sub>24</sub>                | 204.35 | 6831-16-9   | Sesquiterpenes     |
| 21.30 | Guaiol                                                                                                                                                  | C <sub>15</sub> H <sub>26</sub> O              | 222.37 | 489-86-1    | Sesquiterpenes     |
| 21.47 | 2-Naphthalenemethanol, 2,3,4,4a,5,6,7,8-octahydro-.alpha.,.alpha.,4a,8-tetramethyl-, [2R-(2.alpha.,4a.beta.,8.beta.)]-<br>(Rosifoliol)                  | C <sub>15</sub> H <sub>26</sub> O              | 222.37 | 63891-61-2  | Sesquiterpenes     |
| 21.65 | 1(2H)-Naphthalenone, 3,4,4a,5,6,7-hexahydro-4a,5-dimethyl-3-(1-methylethenyl)-, [3S-(3.alpha.,4a.alpha.,5.alpha.)]-<br>(Eremophila-1(10),11-dien-9-one) | C <sub>15</sub> H <sub>22</sub> O              | 218.33 | 562-23-2    | Sesquiterpenes     |
| 21.70 | Neointermedeol                                                                                                                                          | C <sub>15</sub> H <sub>26</sub> O              | 222.37 | 5945-72-2   | Sesquiterpenes     |
| 22.12 | 2,4-Di-tert-butylphenol                                                                                                                                 | C <sub>14</sub> H <sub>22</sub> O              | 206.32 | 96-76-4     | Aromatics          |
| 23.61 | 2(3H)-Naphthalenone, 4,4a,5,6,7,8-hexahydro-4a,5-dimethyl-3-(1-methylethylidene)-, (4ar-cis)-<br>(Dehydrofukinone)                                      | C <sub>15</sub> H <sub>22</sub> O              | 218.33 | 19598-45-9  | Sesquiterpenes     |
| 24.18 | Nootkatone                                                                                                                                              | C <sub>15</sub> H <sub>22</sub> O              | 218.33 | 4674-50-4   | Sesquiterpenes     |
| 24.68 | n-Pentadecanol                                                                                                                                          | C <sub>15</sub> H <sub>32</sub> O              | 228.41 | 629-76-5    | Aliphatic alcohols |
| 24.97 | 7-(2-Hydroxypropan-2-yl)-1,4a-dimethyldecahydronaphthalen-1-ol                                                                                          | C <sub>15</sub> H <sub>28</sub> O <sub>2</sub> | 240.38 | 92857-25-5  | Sesquiterpenes     |
| 26.02 | 7,9-Di-tert-butyl-1-oxaspiro(4,5)deca-6,9-diene-2,8-dione                                                                                               | C <sub>17</sub> H <sub>24</sub> O <sub>3</sub> | 276.40 | 82304-66-3  | Ketones            |
| 26.86 | (3R,3aR,4aS,5R,9aS)-3,5,8-Trimethyl-3a,4,4a,5,6,7,9,9a-octahydroazuleno[6,5-b]furan-2(3H)-one<br>(Dihydrocolumellarin)                                  | C <sub>15</sub> H <sub>22</sub> O <sub>2</sub> | 234.33 | 66873-38-9  | Sesquiterpenes     |

**Table S3** Screening results of odor components in agarwood samples by MRM mode.

| RT    | Compound                   | Formula                                        | m/z     | CAS        | Odor characteristic         |
|-------|----------------------------|------------------------------------------------|---------|------------|-----------------------------|
| 3.22  | alpha-Pinene               | C <sub>10</sub> H <sub>16</sub>                | 136.23  | 80-56-8    | pine, turpentine            |
| 6.48  | Myrcene                    | C <sub>10</sub> H <sub>16</sub>                | 136.23  | 123-35-3   | balsamic, must, spice       |
| 7.10  | 3-Methyl-3-butenyl acetate | C <sub>7</sub> H <sub>12</sub> O <sub>2</sub>  | 128.16  | 5205-07-2  | —                           |
| 7.17  | Limonene                   | C <sub>10</sub> H <sub>16</sub>                | 136.23  | 138-86-3   | lemon, orange               |
| 7.43  | 2-Methyl-1-butanol         | C <sub>5</sub> H <sub>12</sub> O               | 88.15   | 137-32-6   | wine, onion, malt           |
| 8.08  | 2-Pentylfuran              | C <sub>9</sub> H <sub>14</sub> O               | 138.21  | 3777-69-3  | green bean, butter          |
| 8.45  | (E)-beta-Ocimene           | C <sub>10</sub> H <sub>16</sub>                | 136.23  | 3779-61-1  | sweet, herb                 |
| 8.79  | p-Cymene                   | C <sub>10</sub> H <sub>14</sub>                | 134.22  | 99-87-6    | solvent, gasoline, citrus   |
| 8.94  | 1,2,4-Trimethylbenzene     | C <sub>9</sub> H <sub>12</sub>                 | 120.19  | 95-63-6    | —                           |
| 9.19  | Octanal                    | C <sub>8</sub> H <sub>16</sub> O               | 128.21  | 124-13-0   | fat, soap, lemon, green     |
| 10.06 | 6-Methyl-5-hepten-2-one    | C <sub>8</sub> H <sub>14</sub> O               | 126.2   | 110-93-0   | pepper, mushroom, rubber    |
| 10.34 | 2,6-Dimethyl-5-heptenal    | C <sub>9</sub> H <sub>16</sub> O               | 140.22  | 106-72-9   | fruit, green, melon         |
| 10.47 | 1-Hexanol                  | C <sub>6</sub> H <sub>14</sub> O               | 102.17  | 111-27-3   | resin, flower, green        |
| 11.02 | 2-Ethylhexyl acetate       | C <sub>10</sub> H <sub>20</sub> O <sub>2</sub> | 172.26  | 103-09-6   | fruit                       |
| 11.09 | Nonanal*                   | C <sub>9</sub> H <sub>18</sub> O               | 142.24  | 124-19-6   | fat, citrus, green          |
| 11.53 | 1,2,4,5-Tetramethylbenzene | C <sub>10</sub> H <sub>14</sub>                | 134.22  | 95-93-2    | rancid, sweet               |
| 11.72 | alpha,p-Dimethylstyrene    | C <sub>10</sub> H <sub>12</sub>                | 132.2   | 1195-32-0  | citrus, pine                |
| 11.84 | Ethyl octanoate            | C <sub>10</sub> H <sub>20</sub> O <sub>2</sub> | 172.26  | 106-32-1   | fruit, fat                  |
| 11.86 | (Z)-Linalool oxide         | C <sub>10</sub> H <sub>18</sub> O <sub>2</sub> | 170.25  | 60047-17-8 | flower                      |
| 11.98 | Furfural                   | C <sub>5</sub> H <sub>4</sub> O <sub>2</sub>   | 96.0    | 98-01-1    | bread, almond, sweet        |
| 12.14 | 1-Heptanol                 | C <sub>7</sub> H <sub>16</sub> O               | 116.2   | 111-70-6   | chemical, green             |
| 12.29 | (E)-Linalool oxide         | C <sub>10</sub> H <sub>18</sub> O <sub>2</sub> | 170.25  | 34995-77-2 | flower                      |
| 12.46 | Citronellal                | C <sub>10</sub> H <sub>18</sub> O              | 154.25  | 106-23-0   | fat, lemon, rose            |
| 12.58 | 2-Ethylhexanol             | C <sub>8</sub> H <sub>18</sub> O               | 130.22  | 104-76-7   | rose, green                 |
| 12.73 | 2-Acetylfuran              | C <sub>6</sub> H <sub>6</sub> O <sub>2</sub>   | 110.11  | 1192-62-7  | balsamic                    |
| 12.99 | Camphor                    | C <sub>10</sub> H <sub>16</sub> O              | 152.23  | 76-22-2    | camphor                     |
| 13.01 | Benzaldehyde               | C <sub>7</sub> H <sub>6</sub> O                | 106.12  | 100-52-7   | almond, burnt sugar         |
| 13.34 | Ethyl nonanoate            | C <sub>11</sub> H <sub>22</sub> O <sub>2</sub> | 186.29  | 123-29-5   | fruity, rose, nutty         |
| 13.51 | Linalool*                  | C <sub>10</sub> H <sub>18</sub> O              | 154.25  | 78-70-6    | flower, lavender            |
| 13.59 | 1-Octanol*                 | C <sub>8</sub> H <sub>18</sub> O               | 130.229 | 111-87-5   | chemical, metal, burnt      |
| 13.60 | Isobutyric acid            | C <sub>4</sub> H <sub>8</sub> O <sub>2</sub>   | 88.11   | 79-31-2    | rancid, butter, cheese      |
| 13.63 | Linalyl acetate            | C <sub>12</sub> H <sub>20</sub> O <sub>2</sub> | 196.29  | 115-95-7   | sweet, fruit                |
| 13.87 | Diethyl malonate           | C <sub>7</sub> H <sub>12</sub> O <sub>4</sub>  | 160.17  | 105-53-3   | apple                       |
| 14.13 | 2-Acetylpyridine           | C <sub>7</sub> H <sub>7</sub> NO               | 121.14  | 1122-62-9  | popcorn                     |
| 14.42 | Methyl benzoate            | C <sub>8</sub> H <sub>8</sub> O <sub>2</sub>   | 136.15  | 93-58-3    | prune, lettuce, herb, sweet |
| 14.71 | L-Menthol                  | C <sub>10</sub> H <sub>20</sub> O              | 156.26  | 2216-51-5  | peppermint                  |
| 14.78 | Ethyl decanoate            | C <sub>12</sub> H <sub>24</sub> O <sub>2</sub> | 200.32  | 110-38-3   | grape                       |

|       |                       |                                                |        |            |                              |
|-------|-----------------------|------------------------------------------------|--------|------------|------------------------------|
| 14.79 | Acetophenone*         | C <sub>8</sub> H <sub>8</sub> O                | 120.15 | 98-86-2    | must, flower, almond         |
| 15.10 | 4-Methoxystyrene*     | C <sub>9</sub> H <sub>10</sub> O               | 134.17 | 637-69-4   | sweet                        |
| 15.16 | beta-Farnesene        | C <sub>15</sub> H <sub>24</sub>                | 204.35 | 18794-84-8 | wood, citrus, sweet          |
| 15.16 | Dihydrocarvyl acetate | C <sub>12</sub> H <sub>20</sub> O <sub>2</sub> | 196.29 | 20405-60-1 | mint, camphor,<br>medicine   |
| 15.17 | Diethyl succinate     | C <sub>8</sub> H <sub>14</sub> O <sub>4</sub>  | 174.19 | 123-25-1   | wine, fruit                  |
| 15.21 | alpha-Humulene        | C <sub>15</sub> H <sub>24</sub>                | 204.35 | 6753-98-6  | wood                         |
| 15.29 | Neral                 | C <sub>10</sub> H <sub>16</sub> O              | 152.23 | 106-26-3   | lemon                        |
| 15.37 | Linalyl butyrate      | C <sub>14</sub> H <sub>24</sub> O <sub>2</sub> | 224.34 | 78-36-4    | pear, sweet                  |
| 15.37 | alpha-Terpineol       | C <sub>10</sub> H <sub>18</sub> O              | 154.25 | 98-55-5    | oil, anise, mint             |
| 15.40 | gamma-Terpineol       | C <sub>10</sub> H <sub>18</sub> O              | 154.25 | 586-81-2   | clove                        |
| 15.40 | Borneol               | C <sub>10</sub> H <sub>18</sub> O              | 154.25 | 10385-78-1 | camphor                      |
| 15.71 | Linalyl isovalerate   | C <sub>15</sub> H <sub>26</sub> O <sub>2</sub> | 238.37 | 1118-27-0  | sweet, apple, citrus         |
| 15.76 | Valencene             | C <sub>15</sub> H <sub>24</sub>                | 204.35 | 4630-07-3  | green, oil                   |
| 15.81 | Neryl acetate         | C <sub>12</sub> H <sub>20</sub> O <sub>2</sub> | 196.29 | 141-12-8   | fruit                        |
| 15.82 | Valeric acid          | C <sub>5</sub> H <sub>10</sub> O <sub>2</sub>  | 102.13 | 109-52-4   | sweat                        |
| 15.85 | (-)-Carvone           | C <sub>10</sub> H <sub>14</sub> O              | 150.22 | 6485-40-1  | mint                         |
| 15.85 | d-Carvone             | C <sub>10</sub> H <sub>14</sub> O              | 150.22 | 2244-16-8  | caraway                      |
| 15.97 | Naphthalene*          | C <sub>10</sub> H <sub>8</sub>                 | 128.16 | 91-20-3    | Tar, green, oil              |
| 16.0  | Dihydrocarveol        | C <sub>10</sub> H <sub>18</sub> O              | 154.25 | 619-01-2   | mint, spice                  |
| 16.30 | 2,6-Nonadienol        | C <sub>9</sub> H <sub>16</sub> O               | 140.22 | 5820-89-3  | cucumber                     |
| 16.33 | Cuminaldehyde         | C <sub>10</sub> H <sub>12</sub> O              | 148.20 | 122-03-2   | acid, sharp                  |
| 16.34 | Citronellol           | C <sub>10</sub> H <sub>20</sub> O              | 156.26 | 106-22-9   | rose                         |
| 16.34 | p-Acetyltoluene       | C <sub>9</sub> H <sub>10</sub> O               | 134.17 | 122-00-9   | bitter almond                |
| 16.42 | Methyl salicylate     | C <sub>8</sub> H <sub>8</sub> O <sub>3</sub>   | 152.15 | 119-36-8   | peppermint                   |
| 16.68 | Nerol                 | C <sub>10</sub> H <sub>18</sub> O              | 154.25 | 106-25-2   | sweet                        |
| 16.75 | Isodihydrocarveol     | C <sub>10</sub> H <sub>18</sub> O              | 154.25 | 18675-35-9 | wood, spice                  |
| 16.78 | Ethyl nicotinate      | C <sub>8</sub> H <sub>9</sub> NO <sub>2</sub>  | 151.16 | 614-18-6   | medicinal, tincture,<br>anis |
| 16.87 | Geranyl isobutyrate   | C <sub>14</sub> H <sub>24</sub> O <sub>2</sub> | 224.34 | 2345-26-8  | floral                       |
| 16.88 | Ethyl salicylate      | C <sub>9</sub> H <sub>10</sub> O <sub>3</sub>  | 166.17 | 118-61-6   | wintergreen, mint            |
| 17.06 | (E)-carveol           | C <sub>10</sub> H <sub>16</sub> O              | 152.23 | 2102-58-1  | caraway, solvent             |
| 17.17 | Capronic acid         | C <sub>6</sub> H <sub>12</sub> O <sub>2</sub>  | 116.16 | 142-62-1   | sweat                        |
| 17.27 | Guaiacol              | C <sub>7</sub> H <sub>8</sub> O <sub>2</sub>   | 124.14 | 90-05-1    | smoke, sweet,<br>medicine    |
| 17.30 | Geraniol              | C <sub>10</sub> H <sub>18</sub> O              | 154.25 | 106-24-1   | rose, geranium               |
| 17.32 | Ethyl laurate         | C <sub>14</sub> H <sub>28</sub> O <sub>2</sub> | 228.37 | 106-33-2   | leaf                         |
| 17.35 | trans-Geranylacetone  | C <sub>13</sub> H <sub>22</sub> O              | 194.31 | 3796-70-1  | —                            |
| 17.45 | Neryl butyrate        | C <sub>14</sub> H <sub>24</sub> O <sub>2</sub> | 224.34 | 999-40-6   | —                            |
| 17.61 | Benzyl alcohol        | C <sub>7</sub> H <sub>8</sub> O                | 108.14 | 100-51-6   | sweet, flower                |
| 17.84 | Geranyl butyrate      | C <sub>14</sub> H <sub>24</sub> O <sub>2</sub> | 224.34 | 106-29-6   | fruit, rose, apple           |
| 17.96 | 2-Phenylethanol*      | C <sub>8</sub> H <sub>10</sub> O               | 122.16 | 60-12-8    | honey, spice, rose, lilac    |

|       |                          |                                                |         |            |                                       |
|-------|--------------------------|------------------------------------------------|---------|------------|---------------------------------------|
| 18.05 | Butylated hydroxytoluene | C <sub>15</sub> H <sub>24</sub> O              | 220.35  | 128-37-0   | Musty                                 |
| 18.13 | Geranyl isovalerate      | C <sub>15</sub> H <sub>26</sub> O <sub>2</sub> | 238.37  | 109-20-6   | fruit, rose, apple                    |
| 18.34 | beta-Ionone              | C <sub>13</sub> H <sub>20</sub> O              | 192.3   | 14901-07-6 | seaweed, violet,<br>flower, raspberry |
| 18.49 | Benzothiazole            | C <sub>7</sub> H <sub>5</sub> NS               | 135.19  | 95-16-9    | gasoline, rubber                      |
| 18.55 | 2-Acetylpyrrole          | C <sub>6</sub> H <sub>7</sub> NO               | 109.13  | 1072-83-9  | nut, walnut, bread                    |
| 18.59 | 1-Dodecanol              | C <sub>12</sub> H <sub>26</sub> O              | 186.33  | 112-53-8   | fat, wax                              |
| 18.81 | Caryophyllene oxide      | C <sub>15</sub> H <sub>24</sub> O              | 220.35  | 1139-30-6  | herb, sweet, spice                    |
| 18.93 | o-Cresol                 | C <sub>7</sub> H <sub>8</sub> O                | 108.14  | 95-48-7    | phenol                                |
| 18.96 | Phenol                   | C <sub>6</sub> H <sub>6</sub> O                | 94.11   | 108-95-2   | phenol                                |
| 19.16 | Methyl eugenol           | C <sub>11</sub> H <sub>14</sub> O <sub>2</sub> | 178.23  | 93-15-2    | clove, spice                          |
| 19.19 | 4-Ethyl-2-methoxyphenol  | C <sub>9</sub> H <sub>12</sub> O <sub>2</sub>  | 152.19  | 2785-89-9  | spice, clove                          |
| 19.23 | 4-Methoxybenzaldehyde*   | C <sub>8</sub> H <sub>8</sub> O <sub>2</sub>   | 136.15  | 123-11-5   | mint, sweet                           |
| 19.31 | Pantolactone             | C <sub>6</sub> H <sub>10</sub> O <sub>3</sub>  | 130.139 | 599-04-2   | —                                     |
| 19.33 | trans-Cinnamaldehyde     | C <sub>9</sub> H <sub>8</sub> O                | 132.16  | 104-55-2   | cinnamon, paint                       |
| 19.34 | Pentadecanal             | C <sub>15</sub> H <sub>30</sub> O              | 226.4   | 2765-11-9  | fresh                                 |
| 19.41 | (E)-Nerolidol            | C <sub>15</sub> H <sub>26</sub> O              | 222.37  | 7212-44-4  | wood, flower, wax                     |
| 19.51 | Caprylic acid            | C <sub>8</sub> H <sub>16</sub> O <sub>2</sub>  | 144.21  | 124-07-2   | sweat, cheese                         |
| 19.56 | Lilial                   | C <sub>14</sub> H <sub>20</sub> O              | 204.31  | 80-54-6    | floral                                |
| 19.68 | p-Cresol                 | C <sub>7</sub> H <sub>8</sub> O                | 108.14  | 106-44-5   | medicine, phenol,<br>smoke            |
| 20.35 | Ethyl cinnamate          | C <sub>11</sub> H <sub>12</sub> O <sub>2</sub> | 176.21  | 103-36-6   | honey, cinnamon                       |
| 20.47 | Hexadecanal              | C <sub>16</sub> H <sub>32</sub> O              | 240.42  | 629-80-1   | cardboard alpha-<br>Bisabolol         |
| 20.61 | Nonanoic acid            | C <sub>9</sub> H <sub>18</sub> O <sub>2</sub>  | 158.24  | 112-05-0   | green, fat                            |
| 20.76 | Eugenol                  | C <sub>10</sub> H <sub>12</sub> O <sub>2</sub> | 164.20  | 97-53-0    | clove, honey                          |
| 20.78 | p-Vinylguaiaicol         | C <sub>9</sub> H <sub>10</sub> O <sub>2</sub>  | 150.17  | 7786-61-0  | clove, curry                          |
| 21.23 | alpha-Bisabolol          | C <sub>15</sub> H <sub>26</sub> O              | 222.37  | 515-69-5   | spice, flower                         |
| 21.31 | Methyl palmitate         | C <sub>17</sub> H <sub>34</sub> O <sub>2</sub> | 270.5   | 112-39-0   | —                                     |
| 21.42 | beta-Eudesmol            | C <sub>15</sub> H <sub>26</sub> O              | 222.37  | 473-15-4   | wood, green                           |
| 21.70 | Ethyl palmitate          | C <sub>18</sub> H <sub>36</sub> O <sub>2</sub> | 284.5   | 628-97-7   | wax                                   |
| 21.70 | Capric acid              | C <sub>10</sub> H <sub>20</sub> O <sub>2</sub> | 172.26  | 334-48-5   | fat                                   |
| 21.83 | 4-Methoxybenzyl alcohol  | C <sub>8</sub> H <sub>10</sub> O <sub>2</sub>  | 138.16  | 105-13-5   | flower                                |
| 22.54 | Octadecanal              | C <sub>18</sub> H <sub>36</sub> O              | 268.50  | 638-66-4   | oil                                   |
| 22.80 | 1-Hexadecanol            | C <sub>16</sub> H <sub>34</sub> O              | 242.44  | 36653-82-4 | wax, flower                           |
| 23.50 | Coumarin                 | C <sub>9</sub> H <sub>6</sub> O <sub>2</sub>   | 146.14  | 91-64-5    | green, sweet                          |
| 24.09 | Nootkatone*              | C <sub>15</sub> H <sub>22</sub> O              | 218.33  | 4674-50-4  | grapefruit                            |
| 24.35 | Vanillin                 | C <sub>8</sub> H <sub>8</sub> O <sub>3</sub>   | 152.15  | 121-33-5   | vanilla                               |
| 24.64 | Stearyl alcohol          | C <sub>18</sub> H <sub>38</sub> O              | 270.5   | 112-92-5   | oil                                   |
| 24.91 | Hydrocinnamic acid       | C <sub>9</sub> H <sub>10</sub> O <sub>2</sub>  | 150.17  | 501-52-0   | balsamic                              |
| 24.93 | Acetovanillone           | C <sub>9</sub> H <sub>10</sub> O <sub>3</sub>  | 166.17  | 498-02-2   | vanilla                               |

Note: – No related odor description, \* The components detected in both SCAN mode and MRM mode.

**Table S4** Differential odor components for appellation and quality evaluation.

| Origin                                     | RT    | Characteristic components based on SCAN mode                                                                         | RT    | Characteristic components based on MRM mode |
|--------------------------------------------|-------|----------------------------------------------------------------------------------------------------------------------|-------|---------------------------------------------|
| Wild Kynam                                 | 14.13 | $\alpha$ -Guaiene                                                                                                    | 15.37 | Linalyl butyrate                            |
|                                            | 15.17 | 2-hydroxy-benzaldehyde                                                                                               |       |                                             |
|                                            | 15.40 | (4S,4aR,6R)-4,4a-Dimethyl-6-(prop-1-en-2-yl)-1,2,3,4,4a,5,6,7-octahydronaphthalene                                   | 15.40 | gamma-Terpineol                             |
|                                            | 15.80 | $\alpha$ -Bulnesene                                                                                                  | 15.85 | d-Carvone                                   |
|                                            | 17.05 | (-)-Nootkatene                                                                                                       | 15.85 | (-)-Carvone                                 |
|                                            | 18.95 | $\beta$ -Ionone                                                                                                      | 20.78 | p-Vinylguaiaicol                            |
|                                            | 21.65 | Eremophila-1(10),11-dien-9-one                                                                                       |       |                                             |
| High quality agarwood from Hoi-an zone     | 16.00 | 1,1,4,7-Tetramethyldecahydro-1H-cyclopropa[e]azulene-4,7-diol (Aromadendrane-4,10-diol)                              | 13.01 | Benzaldehyde                                |
|                                            | 20.23 | 2-Naphthalenemethanol, 1,2,3,4,4a,5,6,7-octahydro-.alpha.,.alpha.,4a,8-tetramethyl-, (2R-cis)- ( $\gamma$ -Eudesmol) | 14.79 | Acetophenone                                |
|                                            | 20.92 | Agarospinol                                                                                                          | 15.10 | 4-Methoxystyrene                            |
|                                            | 21.18 | (-)-Aristolene                                                                                                       | 19.23 | 4-Methoxybenzaldehyde                       |
|                                            | 21.30 | Guaiol                                                                                                               | 19.34 | Pentadecanal                                |
| High quality agarwood from Guan-xiang zone | 16.00 | 1,1,4,7-Tetramethyldecahydro-1H-cyclopropa[e]azulene-4,7-diol (Aromadendrane-4,10-diol)                              | 15.10 | 4-Methoxystyrene                            |
|                                            | 21.18 | (-)-Aristolene                                                                                                       | 19.23 | 4-Methoxybenzaldehyde                       |
|                                            | 21.30 | Guaiol                                                                                                               | 19.34 | Pentadecanal                                |
| High quality agarwood from Sin-chew zone   | 14.79 | (3S,3aS,6R,8aS)-3,8,8-Trimethyl-7-methyleneoctahydro-1H-3a,6-methanoazulene (Preziza-7(15)-ene)                      | 12.46 | Citronellal                                 |
|                                            | 16.48 | $\alpha$ -Curcumene                                                                                                  | 13.01 | Benzaldehyde                                |
|                                            | 21.06 | (3S,3aS,6R,7S,8aS)-3,7,8,8-Tetramethyloctahydro-1H-3a,6-methanoazulen-7-ol (Prezizaan-7-ol)                          | 14.79 | Acetophenone                                |
|                                            |       |                                                                                                                      | 16.34 | p-Acetyltoiuene                             |
|                                            |       |                                                                                                                      | 19.23 | 4-Methoxybenzaldehyde                       |

**Table S5** Quantitative results of differential components based on aroma database (pg/mg).

| Origin     | Sample  | Citronellal | Benzaldehyde | Acetophenone | 4-Methoxy-styrene | Linalyl butyrate | (-)-Carvone and d-Carvone | p-Acetyltoluene | 4-Methoxy-benzaldehyde | Pentadecanal |
|------------|---------|-------------|--------------|--------------|-------------------|------------------|---------------------------|-----------------|------------------------|--------------|
| Guan-xiang | S2      | /           | 0.885        | 0.174        | 0.020             | /                | 0.077                     | 0.020           | 0.161                  | 0.081        |
|            | S4      |             | 0.597        | 0.151        | 0.022             | 0.155            | 0.311                     | /               | 0.077                  | 0.141        |
|            | S5      |             | 0.491        | 0.170        | 0.055             | 0.026            | /                         | 0.025           | 0.230                  | 0.031        |
|            | S6      |             | 0.939        | 0.177        | 0.018             | 0.008            | 0.325                     | 0.020           | 0.170                  | 0.159        |
|            | S10     |             | 0.225        | 0.178        | 0.052             | 0.010            | /                         | 0.038           | 0.101                  | 0.081        |
|            | S11 (H) |             | 0.392        | 0.160        | 0.133             | 0.278            |                           | 0.025           | 0.577                  | 0.205        |
|            | S13 (H) |             | 0.654        | 0.215        | 0.288             | 0.017            |                           | 0.016           | 0.744                  | 0.430        |
|            | S14 (H) |             | 0.599        | 0.151        | 0.081             | 0.027            |                           | 0.030           | 0.300                  | 0.333        |
| Hoi-an     | S17     | /           | 0.748        | 0.165        | 0.048             | 0.032            | 0.728                     | 0.038           | 0.395                  | 0.100        |
|            | S19     |             | 1.648        | 0.303        | 0.113             | 0.006            |                           | 0.016           | 0.881                  | 0.325        |
|            | S21     |             | 0.402        | 0.143        | 0.047             | 0.018            | /                         | 0.027           | 0.184                  | 0.095        |
|            | S32     |             | 0.364        | 0.169        | 0.094             | 0.098            |                           | 0.035           | 0.728                  | /            |
|            | S27 (H) |             | 2.131        | 0.450        | 0.104             | 0.066            |                           | 0.026           | 0.848                  | 0.289        |
|            | S28 (H) |             | 1.437        | 0.267        | 0.180             | 0.085            |                           | 0.014           | 1.958                  | 0.395        |
|            | S29 (H) |             | 1.345        | 0.315        | 0.106             | 0.082            |                           | 0.017           | 0.682                  | 0.541        |
|            | S31 (H) |             | 1.226        | 0.271        | 0.150             | 0.066            |                           | 0.042           | 0.800                  | 0.156        |
|            | S33 (H) |             | 1.284        | 0.38         | 0.115             | 0.110            |                           | 0.040           | 0.927                  | 1.142        |
| Sin-chew   | S37     | /           | 0.843        | 0.191        | 0.035             | /                | 0.349                     | 0.027           | 0.119                  | 0.143        |
|            | S39     |             | 0.819        | 0.213        | 0.038             |                  |                           | 0.037           | 0.171                  | 0.095        |
|            | S40     |             | 1.439        | 0.273        | 0.043             |                  | /                         | 0.020           | 0.252                  | 0.066        |

|              |         |       |       |       |       |       |       |       |       |       |
|--------------|---------|-------|-------|-------|-------|-------|-------|-------|-------|-------|
|              | S42 (H) | 0.005 | 0.860 | 0.792 | 0.070 | 0.080 |       | 0.042 | 0.532 | 0.114 |
|              | S43 (H) | 0.839 | 1.114 | 2.187 | /     | /     | 0.154 | 0.041 | 0.290 | 0.247 |
|              | S45 (H) | 0.278 | 0.855 | 0.748 |       | 0.162 | 0.027 | 0.092 | 0.333 | 0.548 |
|              | S46 (H) | 0.266 | 0.903 | 1.411 |       | /     | 0.072 | 0.083 | 0.295 | 0.758 |
| <b>Kynam</b> | S50 (H) | /     | 0.610 | 0.096 | 0.042 | 4.369 | 4.607 | /     | 0.831 | 0.338 |
|              | S51 (H) |       | 0.716 | 0.134 | 0.066 | 0.815 | 2.216 |       | 0.830 | 0.154 |
|              | S54 (H) |       | 0.397 | 0.086 | 0.055 | 0.241 | 0.567 |       | 0.675 | 0.165 |

H: High quality sample.
